# Supplementary material for: Synthesis, structural studies, and redox chemistry of bimetallic [Mn(CO)3] and [Re(CO)3] complexes
Source: Royal Society of Chemistry journal article supplement (doi:10.1039/d0dt03666h), 2021-01-01
Supplement: d0dt03666h2.pdf [file d0dt03666h2.pdf]

Electronic Supplementary Information for:

## Synthesis, structural studies, and redox chemistry of bimetallic [Mn(CO)<sub>3</sub>] and [Re(CO)<sub>3</sub>] complexes

Wade C. Henke,<sup>a</sup> Tyler A. Kerr,<sup>a</sup> Thomas R. Sheridan,<sup>b</sup> Lawrence M. Henling,<sup>b</sup>  
Michael K. Takase,<sup>b</sup> Victor W. Day,<sup>a</sup> Harry B. Gray,<sup>b</sup> and James D. Blakemore<sup>\*,a,b</sup>

<sup>a</sup>Department of Chemistry, University of Kansas  
1567 Irving Hill Road, Lawrence, KS 66045

<sup>b</sup>Beckman Institute and Division of Chemistry and Chemical Engineering,  
California Institute of Technology, Pasadena, California 91125

\* To whom correspondence should be addressed.  
e-mail: blakemore@ku.edu; phone: +1 (785) 864-3019

### Contents

#### NMR Spectra

|                                                                                                                                        |    |
|----------------------------------------------------------------------------------------------------------------------------------------|----|
| Figure S1: <sup>1</sup> H-NMR Spectrum of <b>5-syn</b> + <b>5-anti</b> .....                                                           | S3 |
| Figure S2: Zoomed in <sup>1</sup> H-NMR Spectrum of <b>5-syn</b> + <b>5-anti</b> .....                                                 | S3 |
| Figure S3: <sup>1</sup> H-NMR Spectrum Comparing the Ratio of <b>5-syn</b> + <b>5-anti</b> .....                                       | S3 |
| Figure S4: <sup>1</sup> H-NMR Spectrum of <b>6-syn</b> + <b>6-anti</b> .....                                                           | S4 |
| Figure S5: Zoomed in <sup>1</sup> H-NMR Spectrum of <b>6-syn</b> + <b>6-anti</b> .....                                                 | S4 |
| Figure S6: <sup>1</sup> H-NMR Spectrum Comparing the Ratio of <b>6-syn</b> + <b>6-anti</b> .....                                       | S4 |
| Figure S7: Stacked <sup>1</sup> H-NMR Spectra of Complexes <b>2</b> , <b>5</b> , and <b>6</b> , <b>syn</b> + <b>anti</b> Isomers ..... | S5 |
| Figure S8: <sup>1</sup> H-NMR Spectrum of <i>In Situ</i> Reduction of Complex <b>2-syn</b> + <b>2-anti</b> .....                       | S6 |

#### IR Spectra

|                                                                                                      |    |
|------------------------------------------------------------------------------------------------------|----|
| Figure S9: Stacked IR Spectra of <b>5-syn</b> + <b>5-anti</b> and <b>6-syn</b> + <b>6-anti</b> ..... | S7 |
|------------------------------------------------------------------------------------------------------|----|

#### Mass Spectra

|                                                                                           |    |
|-------------------------------------------------------------------------------------------|----|
| Figure S10: Full High Resolution Mass Spectrum of <b>5-syn</b> + <b>5-anti</b> .....      | S8 |
| Figure S11: Zoomed in High Resolution Mass Spectrum of <b>5-syn</b> + <b>5-anti</b> ..... | S8 |
| Figure S12: Full High-Resolution Mass Spectrum of <b>6-syn</b> + <b>6-anti</b> .....      | S9 |
| Figure S13: Zoomed in High Resolution Mass Spectrum of <b>6-syn</b> + <b>6-anti</b> ..... | S9 |

#### Electronic Absorption Spectra

|                                                                                                                             |     |
|-----------------------------------------------------------------------------------------------------------------------------|-----|
| Figure S14: EAS Spectrum of <b>5-syn</b> + <b>5-anti</b> in MeCN .....                                                      | S10 |
| Figure S15: EAS Spectrum of <b>6-syn</b> + <b>6-anti</b> in MeCN .....                                                      | S10 |
| Figure S16: Stacked EAS Spectra of <b>4</b> , <b>5-syn</b> + <b>5-anti</b> , and <b>6-syn</b> + <b>6-anti</b> in MeCN ..... | S11 |

#### Electrochemical Data

|                                                                       |     |
|-----------------------------------------------------------------------|-----|
| Figure S17: Cyclic Voltammogram of <b>1</b> .....                     | S12 |
| Figure S18: Cyclic Voltammogram of <b>2-syn</b> + <b>2-anti</b> ..... | S12 |

|                                                                                           |     |
|-------------------------------------------------------------------------------------------|-----|
| <b>Figure S19:</b> Extended Cyclic Voltammogram of <b>2-syn + 2-anti</b> .....            | S13 |
| <b>Figure S20:</b> Cyclic Voltammogram of <b>3</b> .....                                  | S13 |
| <b>Figure S21:</b> Cyclic Voltammogram of <b>4</b> .....                                  | S14 |
| <b>Figure S22:</b> Cyclic Voltammogram of <b>5-syn + 5-anti</b> .....                     | S14 |
| <b>Figure S23:</b> Cyclic Voltammogram of <b>6-syn + 6-anti</b> .....                     | S15 |
| <b>Figure S24:</b> Stacked Cyclic Voltammograms of Complexes <b>1-6</b> .....             | S15 |
| <b>Figure S25:</b> Scan Rate Dependence Data of <b>1</b> .....                            | S16 |
| <b>Figure S26:</b> Scan Rate Dependence Data of <b>2-syn + 2-anti</b> First Couple.....   | S16 |
| <b>Figure S27:</b> Scan Rate Dependence Data of <b>2-syn + 2-anti</b> Second Couple ..... | S17 |
| <b>Figure S28:</b> Scan Rate Dependence Data of <b>3</b> .....                            | S17 |
| <b>Figure S29:</b> Scan Rate Dependence Data of <b>4</b> .....                            | S18 |
| <b>Figure S30:</b> Scan Rate Dependence Data of <b>5-syn + 5-anti</b> .....               | S18 |
| <b>Figure S31:</b> Scan Rate Dependence Data of <b>6-syn + 6-anti</b> .....               | S19 |

### EPR Data

|                                                                                                                        |     |
|------------------------------------------------------------------------------------------------------------------------|-----|
| <b>Figure S32:</b> Experimental and Simulated EPR Spectrum of One Electron Reduced Complex <b>2-syn + 2-anti</b> ..... | S20 |
|------------------------------------------------------------------------------------------------------------------------|-----|

### Crystallographic Information

|                                                                      |     |
|----------------------------------------------------------------------|-----|
| <i>Refinement Details</i> .....                                      | S21 |
| <b>Table S1:</b> Crystal and refinement data .....                   | S22 |
| <b>Special Refinement Details for 1</b> .....                        | S25 |
| <b>Figure S33:</b> Solid-state structure of <b>1</b> .....           | S26 |
| <b>Figure S34:</b> Full solid-state structure of <b>1</b> .....      | S27 |
| <b>Special Refinement Details for 2-anti</b> .....                   | S28 |
| <b>Figure S35:</b> Solid-state structure of <b>2-anti</b> .....      | S29 |
| <b>Figure S36:</b> Full-solid-state structure of <b>2-anti</b> ..... | S30 |
| <b>Special Refinement Details for 3</b> .....                        | S31 |
| <b>Figure S37:</b> Full solid-state structure of <b>3</b> .....      | S31 |
| <b>Special Refinement Details for 4</b> .....                        | S32 |
| <b>Figure S38:</b> Full solid-state structure of <b>4</b> .....      | S33 |
| <b>Special Refinement Details for 5-syn</b> .....                    | S34 |
| <b>Figure S39:</b> Solid-state structure of <b>5-syn</b> .....       | S35 |
| <b>Figure S40:</b> Full solid-state structure of <b>5-syn</b> .....  | S36 |
| <b>Special Refinement Details for 5-anti</b> .....                   | S37 |
| <b>Figure S41:</b> Full solid-state structure of <b>5-anti</b> ..... | S37 |
| <b>Special Refinement Details for 6-syn</b> .....                    | S38 |
| <b>Figure S42:</b> Solid-state structure of <b>6-syn</b> .....       | S39 |
| <b>Figure S43:</b> Full solid-state structure of <b>6-syn</b> .....  | S40 |
| <b>References</b> .....                                              | S41 |

## NMR Spectra

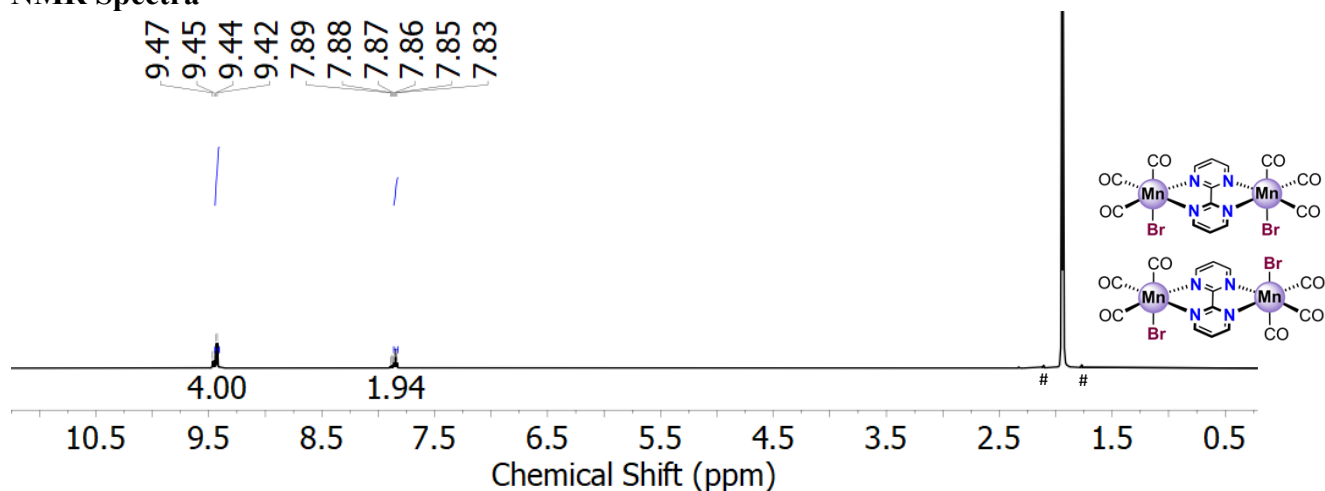

**Figure S1:**  $^1\text{H}$ -NMR spectrum (400 MHz,  $\text{CD}_3\text{CN}$ ) of **5-syn** + **5-anti**. The # symbols denote  $^{13}\text{C}$  satellites on the  $\text{CD}_3\text{CN}$  protio-solvent residual.

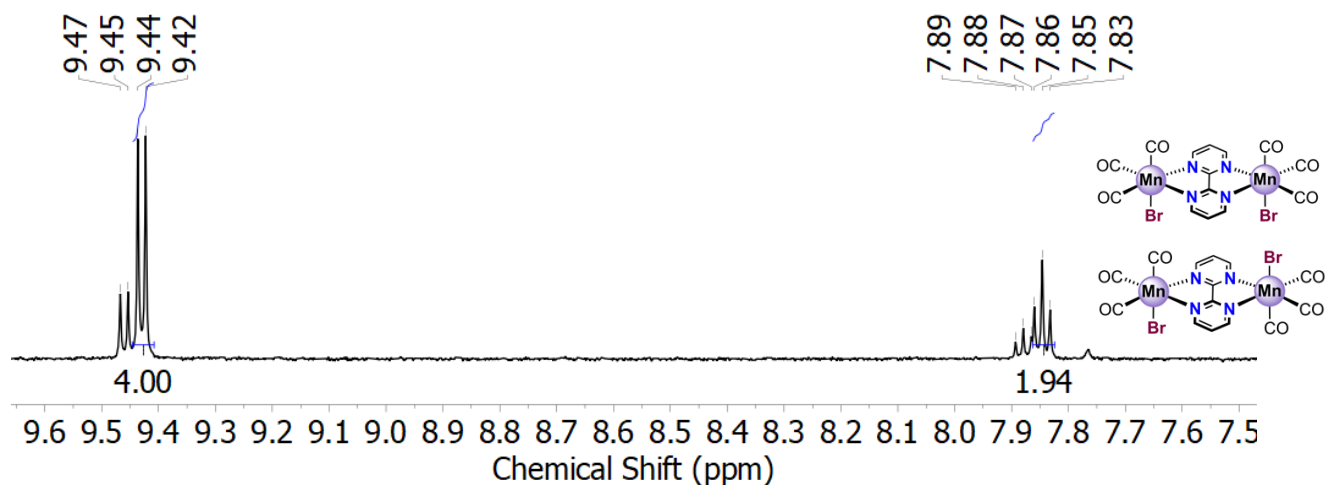

**Figure S2:** Zoomed-in  $^1\text{H}$ -NMR spectrum (400 MHz,  $\text{CD}_3\text{CN}$ ) of **5-syn** + **5-anti** highlighting the aromatic region.

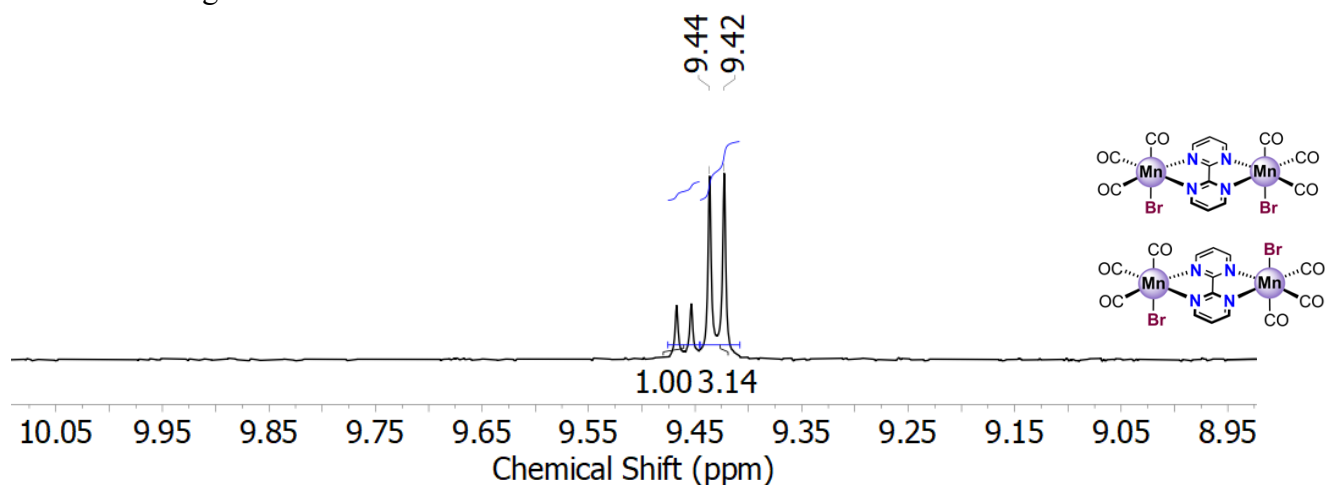

**Figure S3:**  $^1\text{H}$ -NMR spectrum (400 MHz,  $\text{CD}_3\text{CN}$ ) comparing the ratio of **5-syn** + **5-anti**.

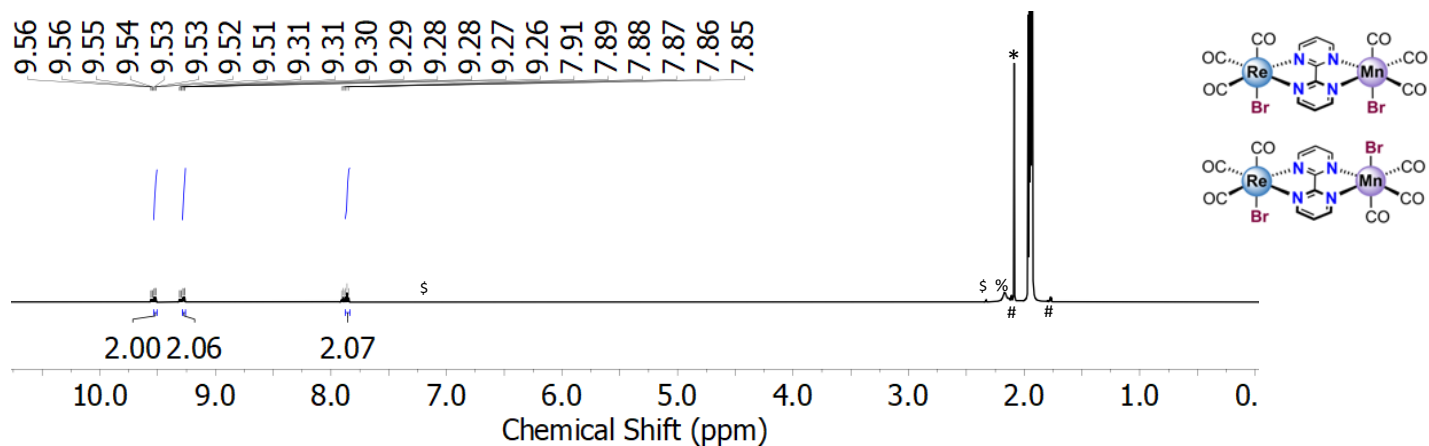

**Figure S4:**  $^1\text{H-NMR}$  spectrum (400 MHz,  $\text{CD}_3\text{CN}$ ) of **6-syn** + **6-anti**. The symbols denote the  $^{13}\text{C}$  satellites on the  $\text{CD}_3\text{CN}$  protio-solvent residuals (#), toluene (\$), water (%), and adventitious acetone (\*).

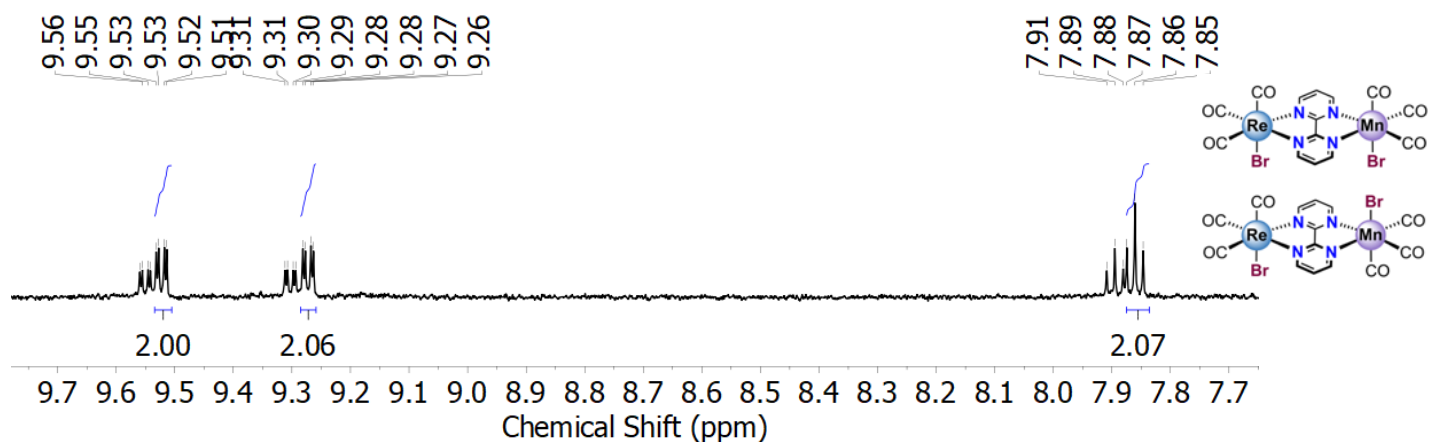

**Figure S5:** Zoomed-in  $^1\text{H-NMR}$  spectrum (400 MHz,  $\text{CD}_3\text{CN}$ ) of **6-syn** + **6-anti**

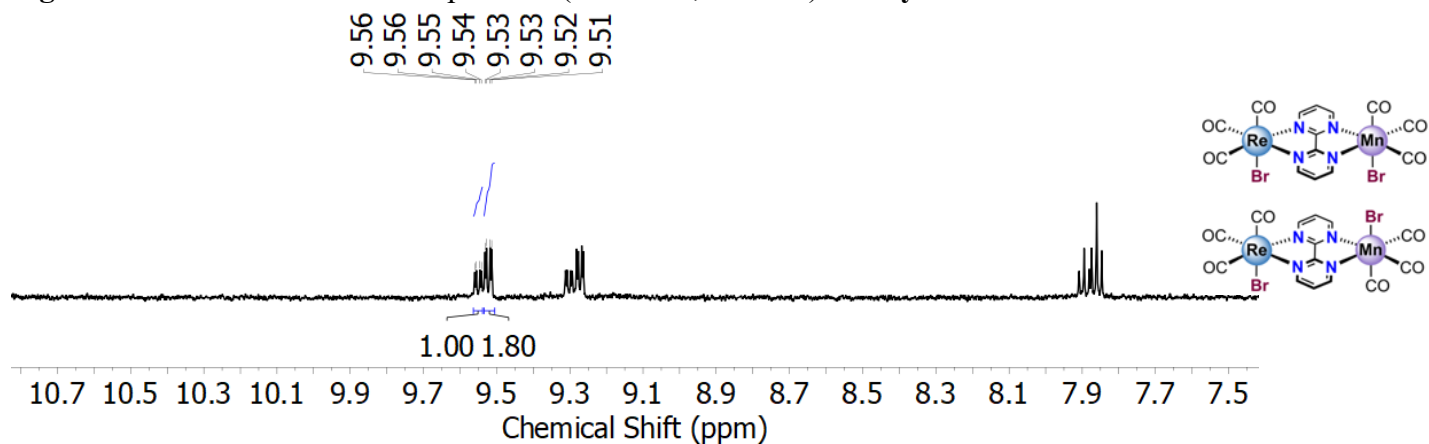

**Figure S6:**  $^1\text{H-NMR}$  spectrum (400 MHz,  $\text{CD}_3\text{CN}$ ) comparing the ratio of **6-syn** + **6-anti**.

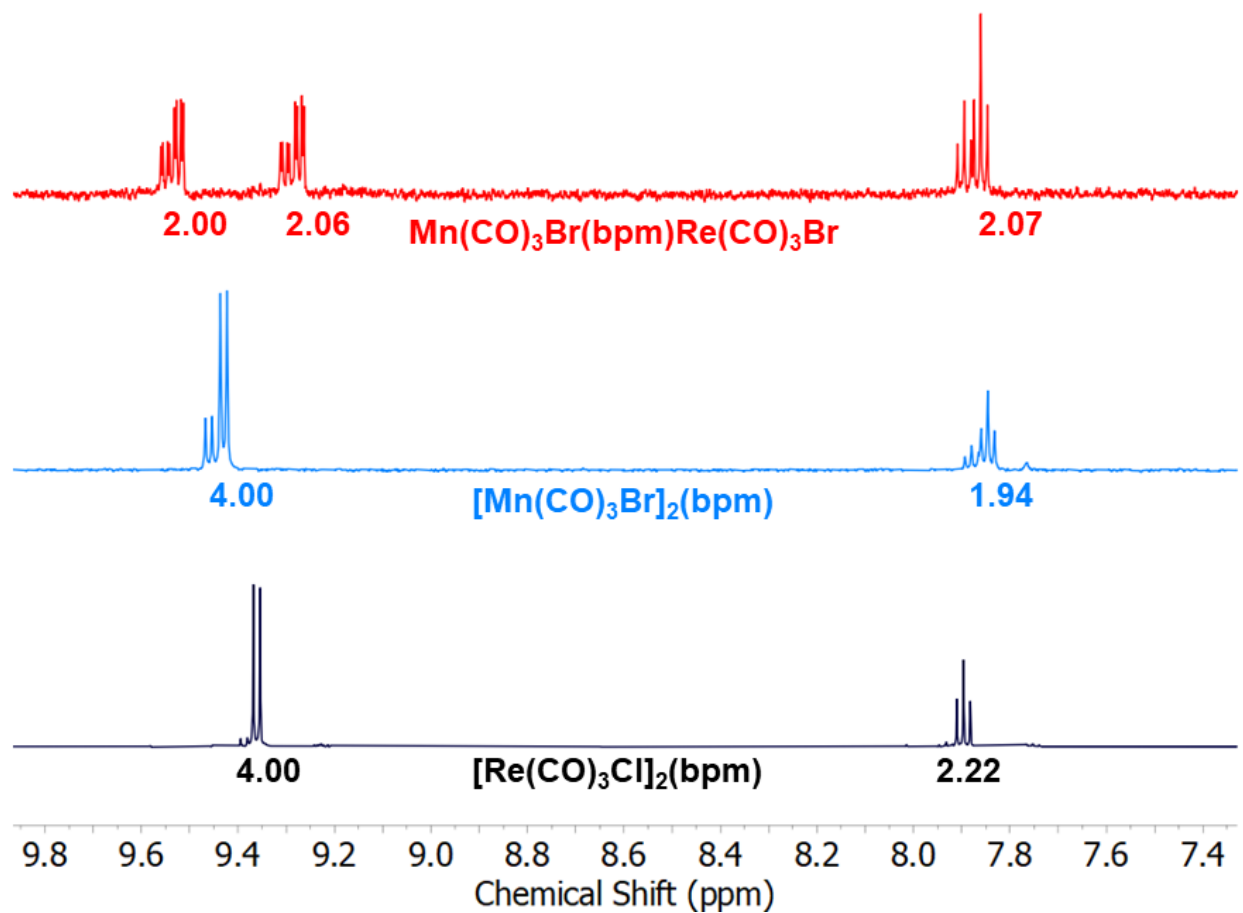

**Figure S7:** Stacked  $^1\text{H-NMR}$  spectra (400 MHz,  $\text{CD}_3\text{CN}$ ) of **2-syn + 2-anti (black)**, **5-syn + 5-anti (blue)**, and **6-syn + 6-anti (red)**. The presence of both **syn-** and **anti-**isomers give rise to the additional resonances in the spectra.

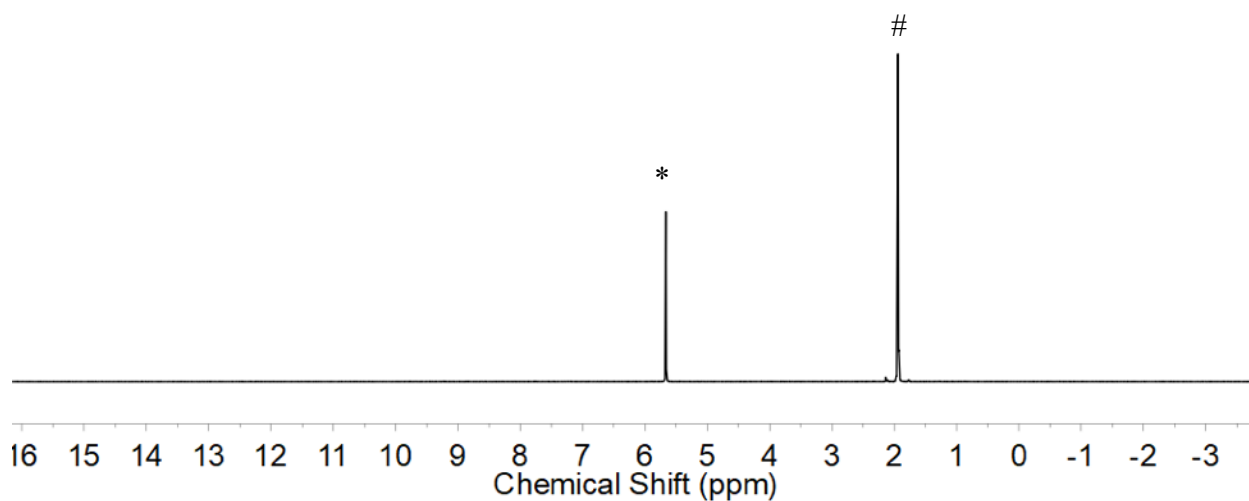

**Figure S8:** The resulting <sup>1</sup>H-NMR spectrum (400 MHz, CD<sub>3</sub>CN) following the *in situ* one e<sup>-</sup> reduction of complex **2-syn** + **2-anti** using the stoichiometric reductant Cp<sub>2</sub>Co. The resulting complex is NMR silent, consistent with the presence of an expected paramagnetic species. The presence of [Cp<sub>2</sub>Co]Cl (\*) , 5.66 ppm) and the solvent residual CD<sub>2</sub>(H)CN (#).

## IR Spectra

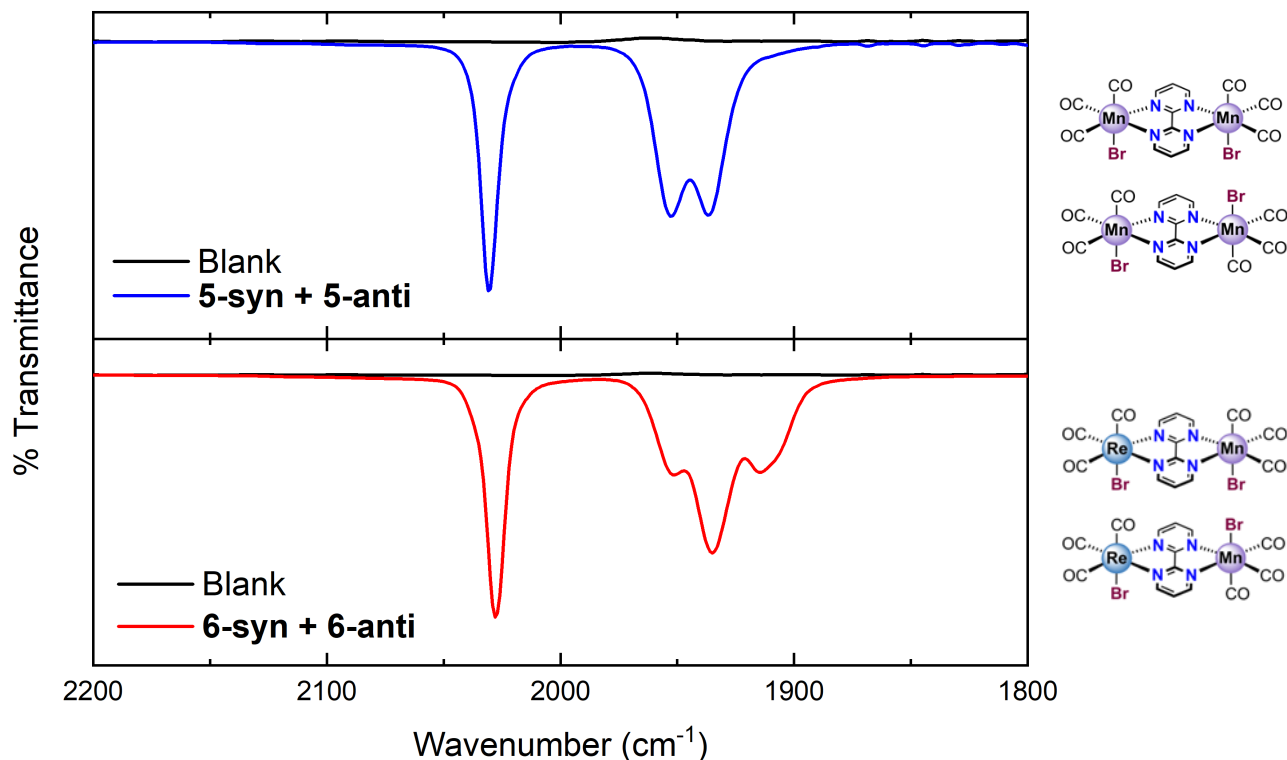

**Figure S9:** IR spectra for the CO stretching region showing the carbonyl stretches for **5-syn + 5-anti** (upper panel) and **6-syn + 6-anti** (lower panel) in THF solution. The greater number of CO stretches for **6-syn + 6-anti** in comparison to **5-syn + 5-anti** can be attributed to the lower symmetry of the heterobimetallic compound. The symmetries of **5-syn + 5-anti** are  $C_{2v}$  and  $C_{2h}$ , respectively. Group theory analysis predicts that **5-syn** should have six IR active bands while **5-anti** should have three IR active bands. Experimentally, there is likely significant overlap of bands for the CO stretches, as they should have very similar energies, resulting in only three apparent bands. The symmetries of **6-syn + 6-anti** are both  $C_s$ . Group theory analysis thus predicts that both compounds should each have six IR-active CO stretching modes. Experimentally, the observation of a greater number of overlapping bands is consistent with the decreased symmetry as well as the anticipated electronic difference between the  $[Mn(CO)_3]$  and  $[Re(CO)_3]$  motifs in both isomers.

## High Resolution Mass Spectra

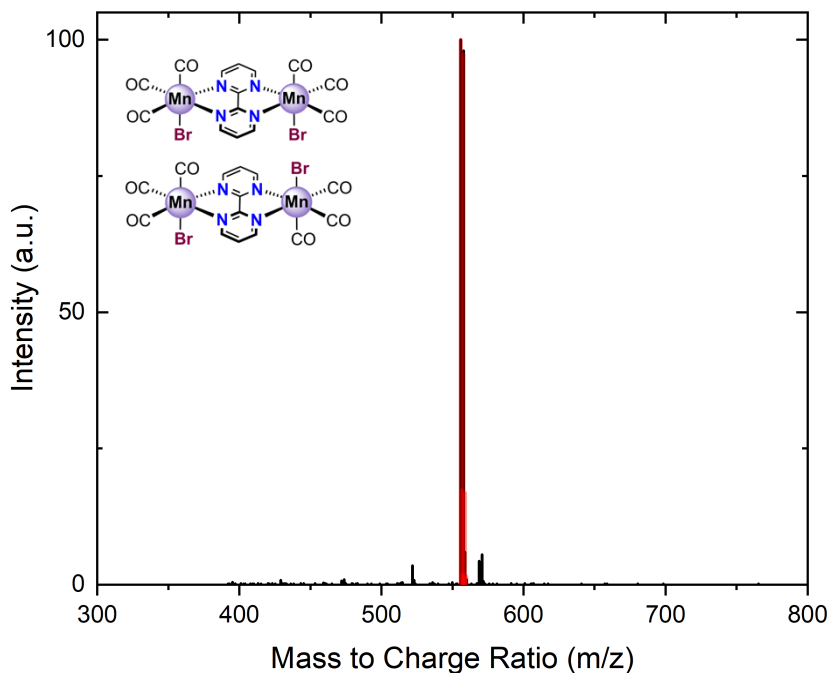

**Figure S10:** Full high-resolution mass spectrum of **5-syn** + **5-anti**. Both syn and anti isomers could be present and the resulting acetonitrile ligand could bind to either Re or Mn. The experimental data is shown in **black** and the predicted data is shown in **red**. The identified fragment is given in detail below.

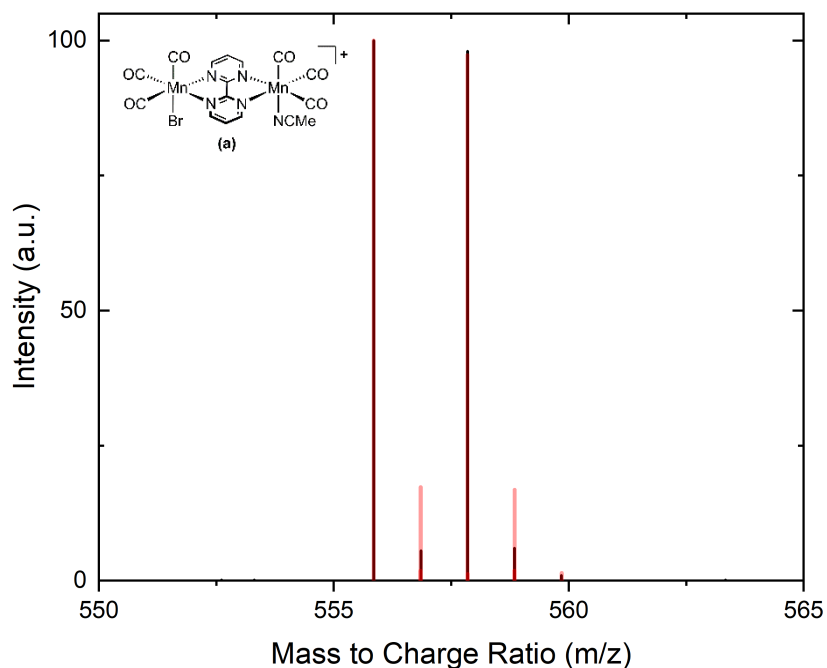

**Figure S11:** Fragment (a) was the identified fragment in the data from Figure S10 (Experimental: **555.8495**; Theoretical: **555.8497**).



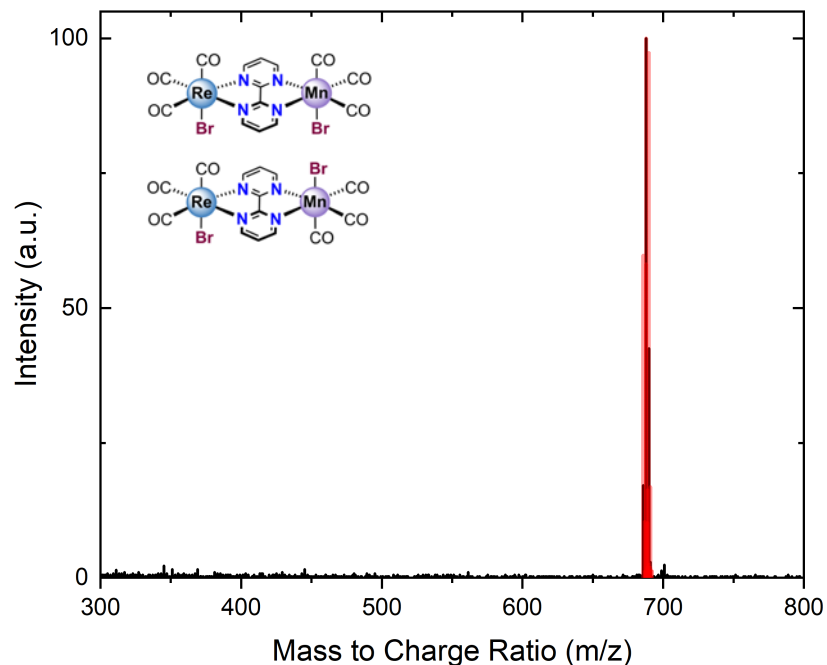

**Figure S12:** Full high-resolution mass spectrum of **6-syn** + **6-anti**. Both syn and anti isomers could be present, and the resulting acetonitrile ligand could bind to Re or Mn. The experimental data is shown in **black** and the predicted data is shown in **red**. The identified fragment is investigated below.

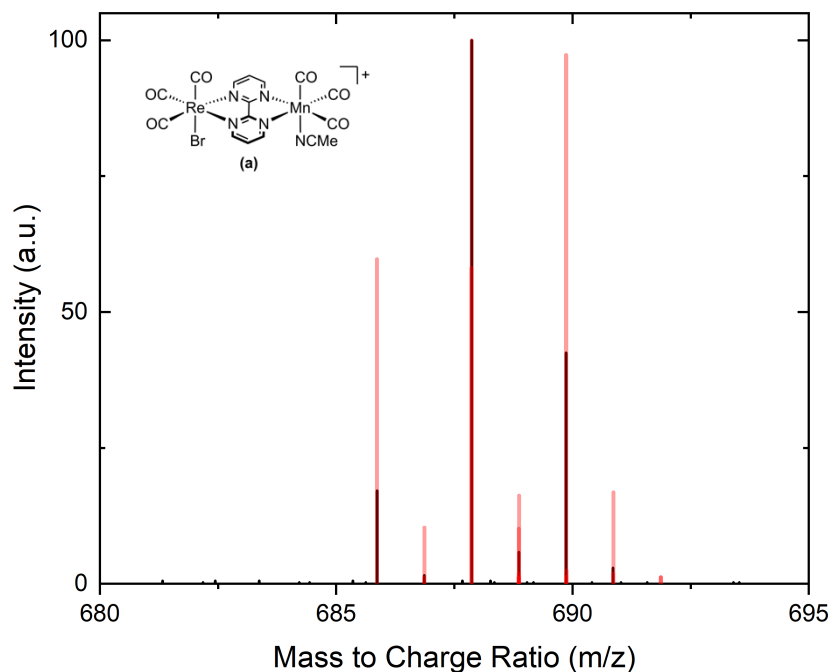

**Figure S13:** Fragment **(a)** was the identified fragment in the data from Figure S12 (Experimental: 687.8672; Theoretical: 687.8674).

## Electronic Absorption Spectra

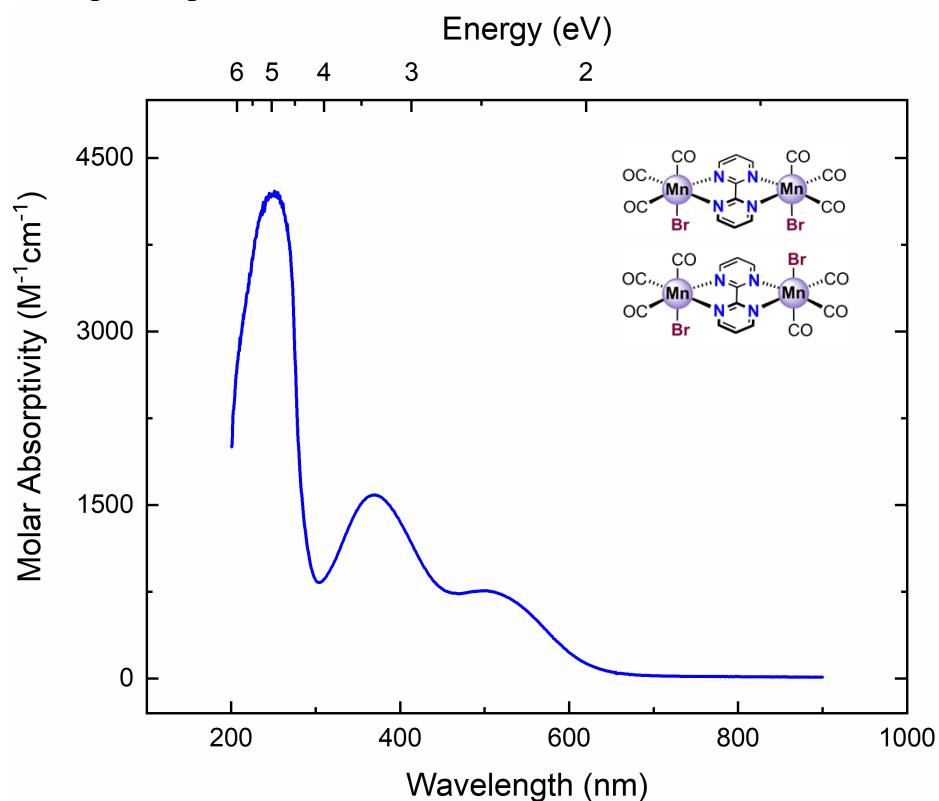

**Figure S14:** Electronic absorption spectrum of **5-syn** + **5-anti** in MeCN.

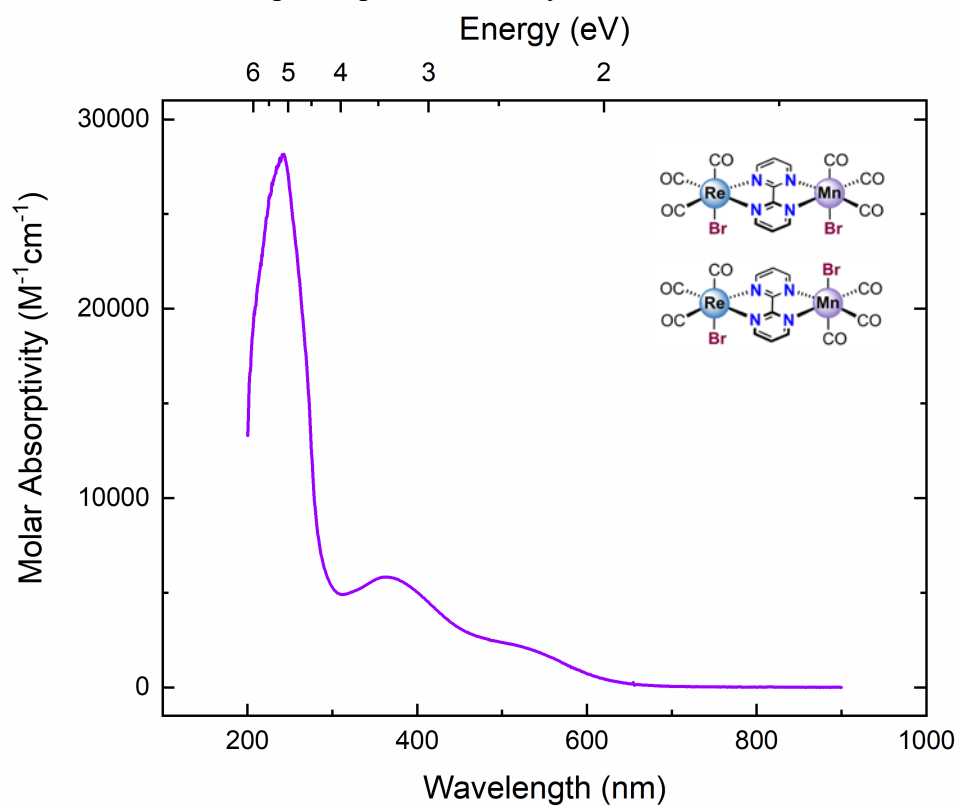

**Figure S15:** Electronic absorption spectrum of **6-syn** + **6-anti** in MeCN.

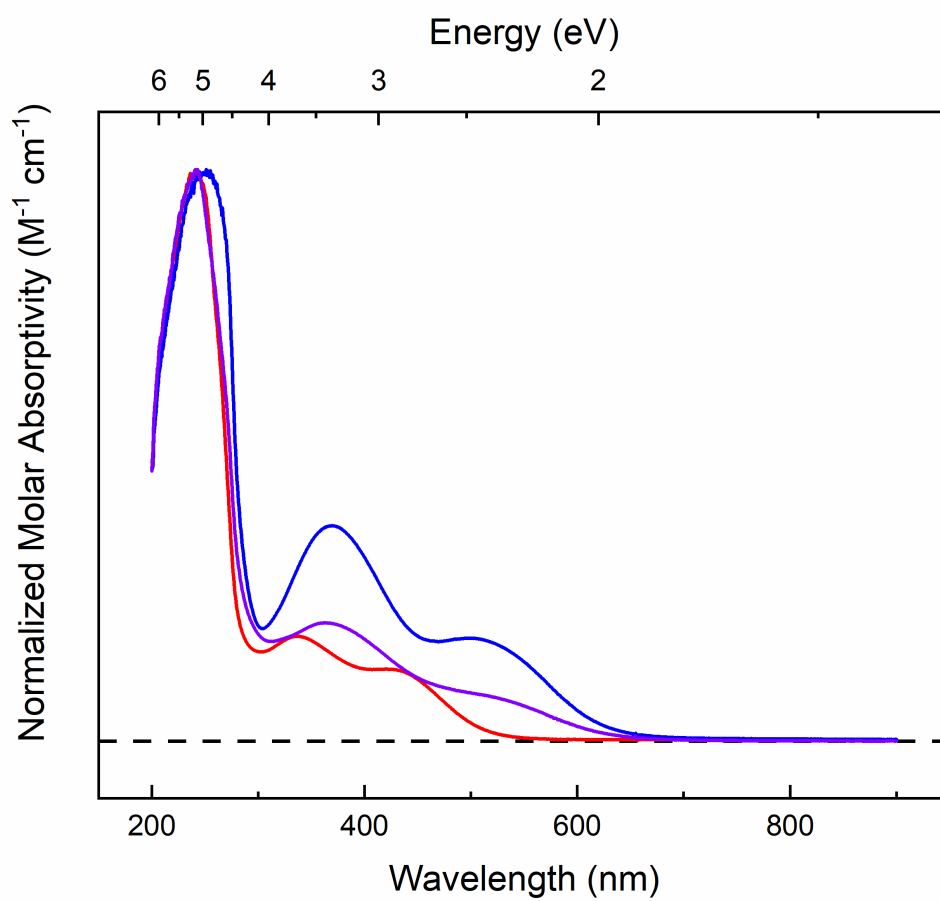

**Figure S16:** Normalized stacked electronic absorption spectra of **4** (red), **5-syn + 5-anti** (blue), and **6-syn + 6-anti** (purple) in MeCN.

### Cyclic Voltammetry Data

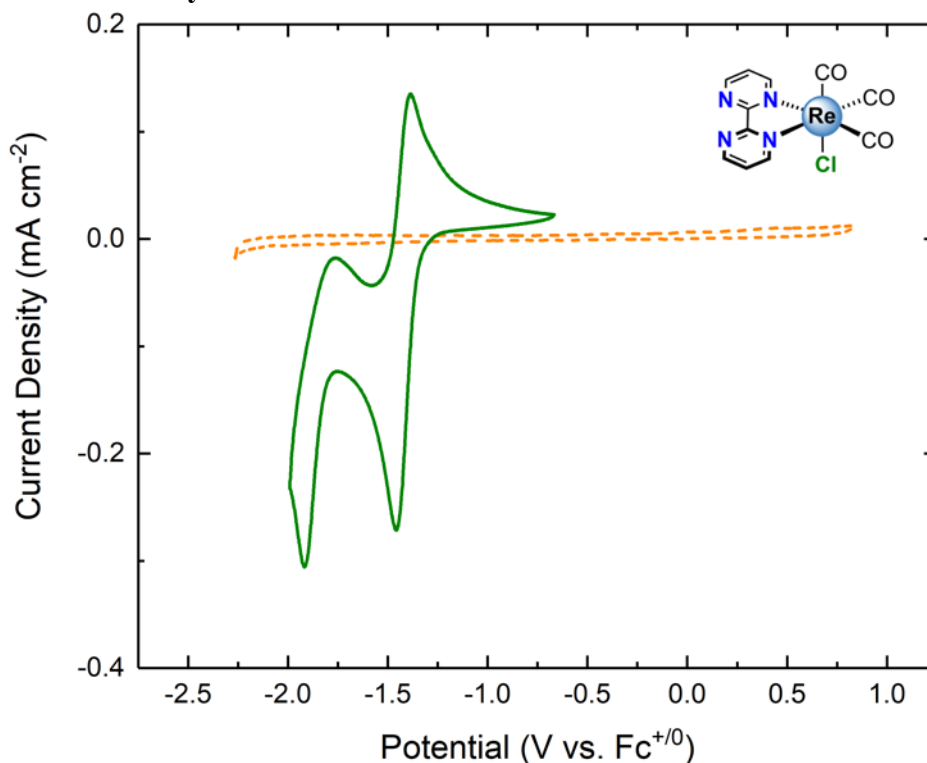

**Figure S17:** Cyclic voltammogram (100 mV/s) of **1** (green) in 0.1M TBAPF<sub>6</sub>/MeCN solution. The orange trace is the blank taken prior to beginning the experiment.

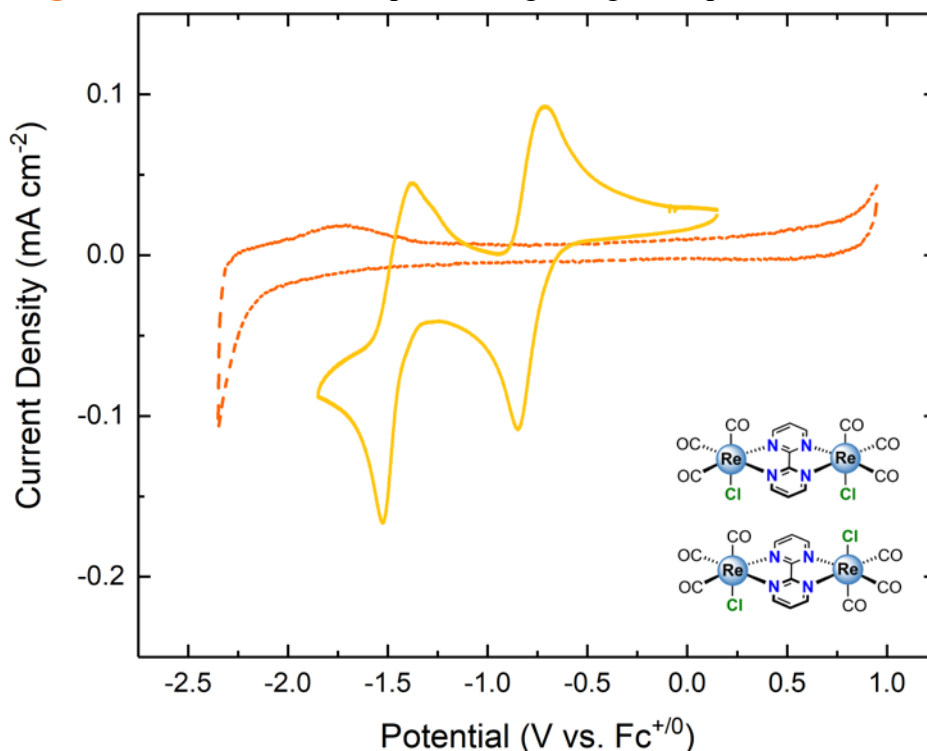

**Figure S18:** Cyclic voltammogram (100 mV/s) of **2-syn + 2-anti** (yellow) in 0.1M TBAPF<sub>6</sub>/MeCN solution. The orange trace is the blank taken prior to beginning the experiment.

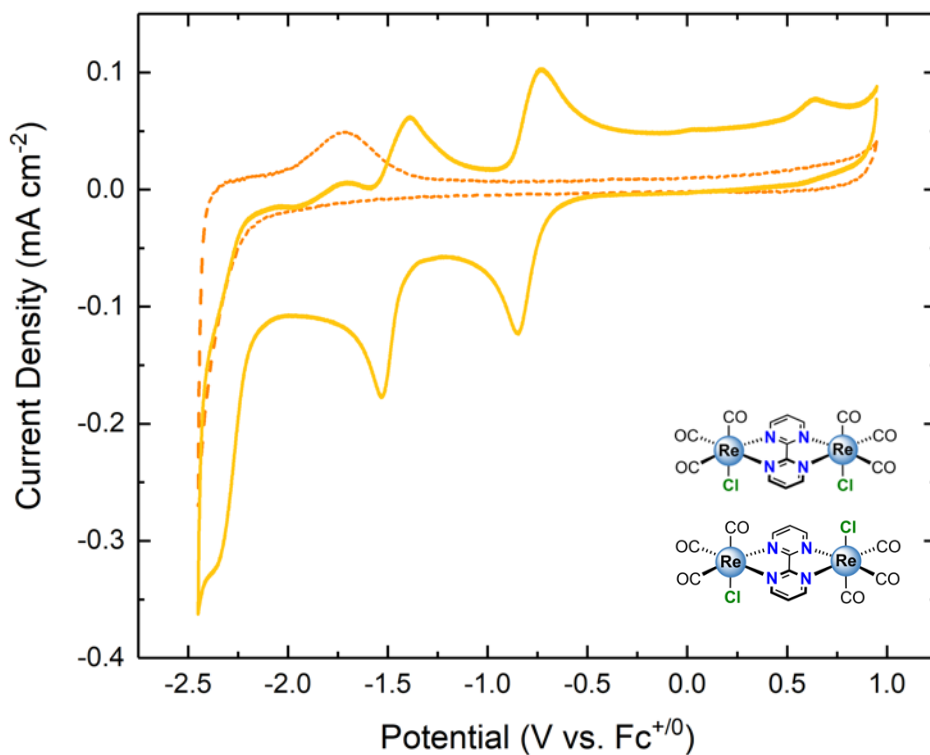

**Figure S19:** Extended cyclic voltammogram (100 mV/s) of **2-syn + 2-anti** (yellow) in 0.1M TBAPF<sub>6</sub>/MeCN solution. The orange trace is the blank taken prior to beginning the experiment.

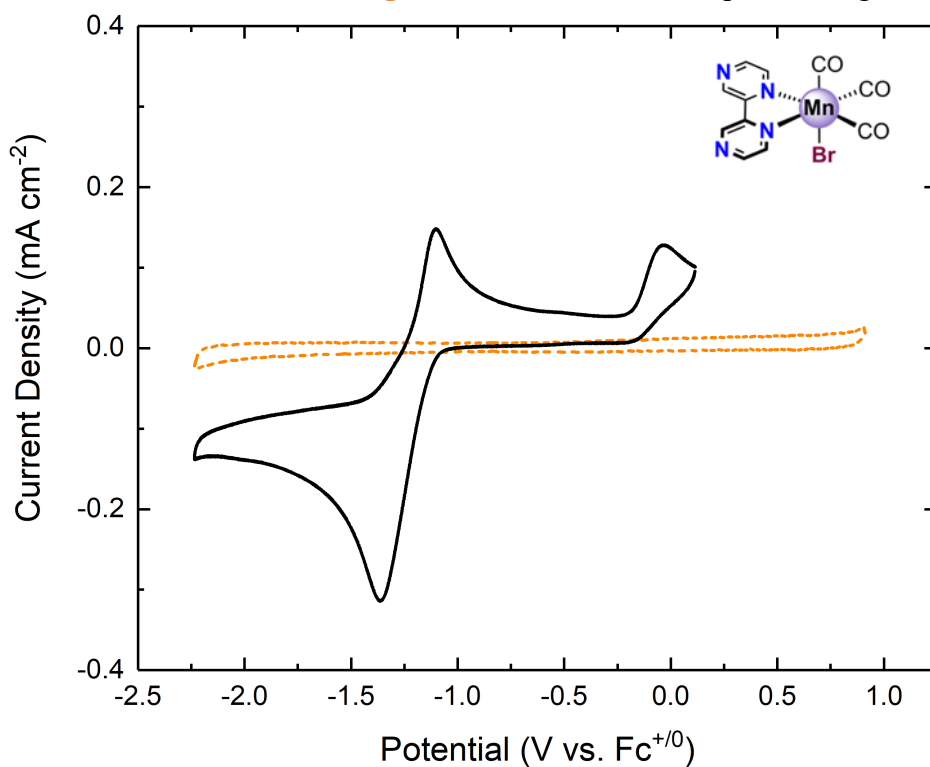

**Figure S20:** Cyclic voltammogram (100 mV/s) of **3** (black) in 0.1M TBAPF<sub>6</sub>/MeCN solution. The orange trace is the blank taken prior to beginning the experiment.

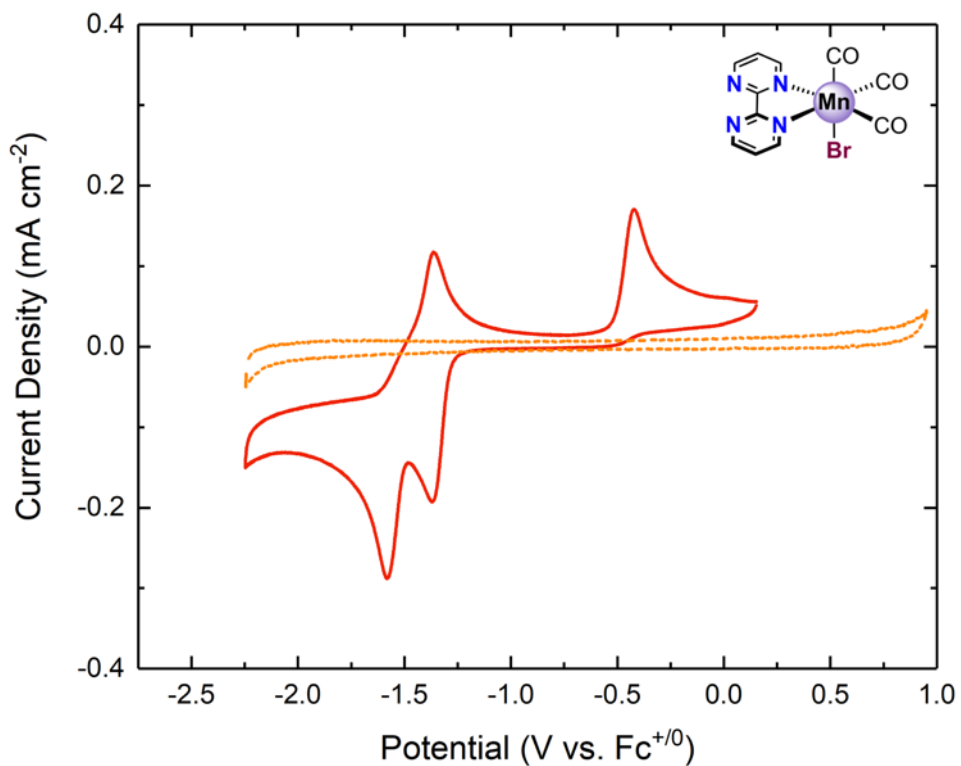

**Figure 21:** Cyclic voltammogram (100 mV/s) of **4** (red) in 0.1M TBAPF<sub>6</sub>/MeCN solution. The orange trace is the blank taken prior to beginning the experiment.

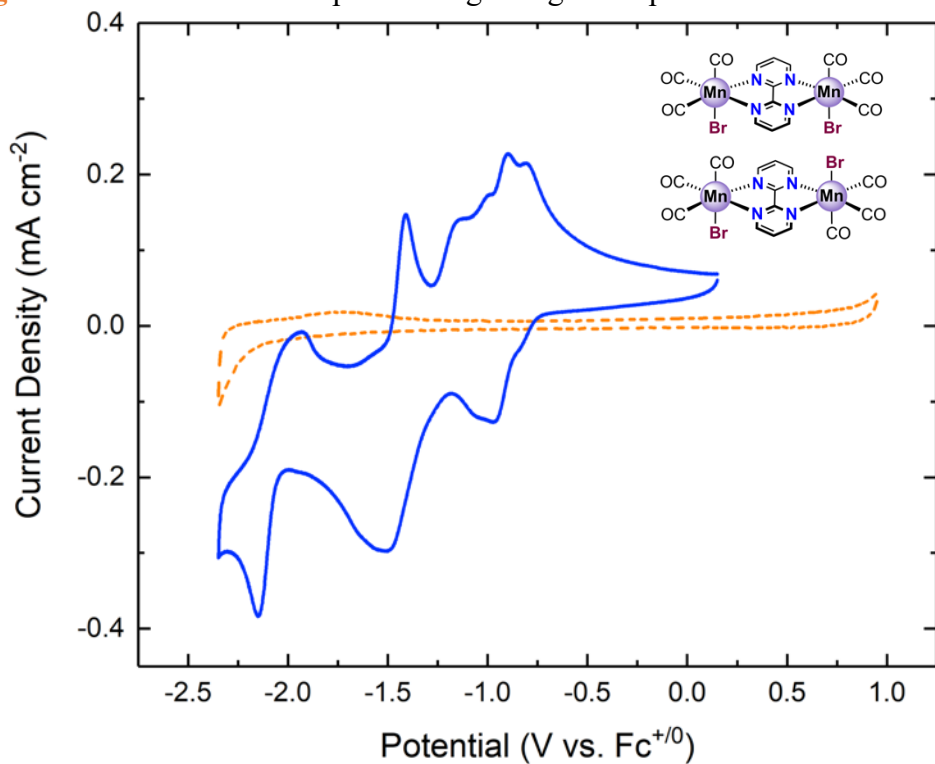

**Figure S22:** Cyclic voltammogram (100 mV/s) of **5-syn + 5-anti** (blue) in 0.1M TBAPF<sub>6</sub>/MeCN solution. The orange trace is the blank taken prior to beginning the experiment.

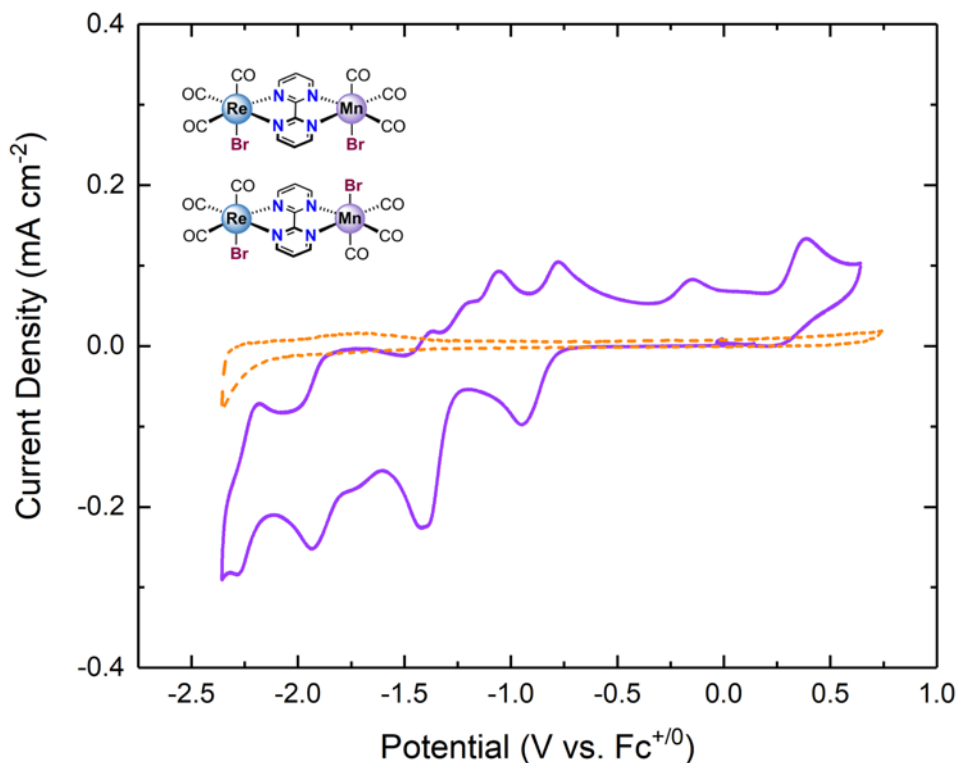

**Figure S23:** Cyclic voltammogram (100 mV/s) of **6-syn + 6-anti** (purple) in 0.1M TBAPF<sub>6</sub>/MeCN solution. The orange trace is the blank taken prior to beginning the experiment.

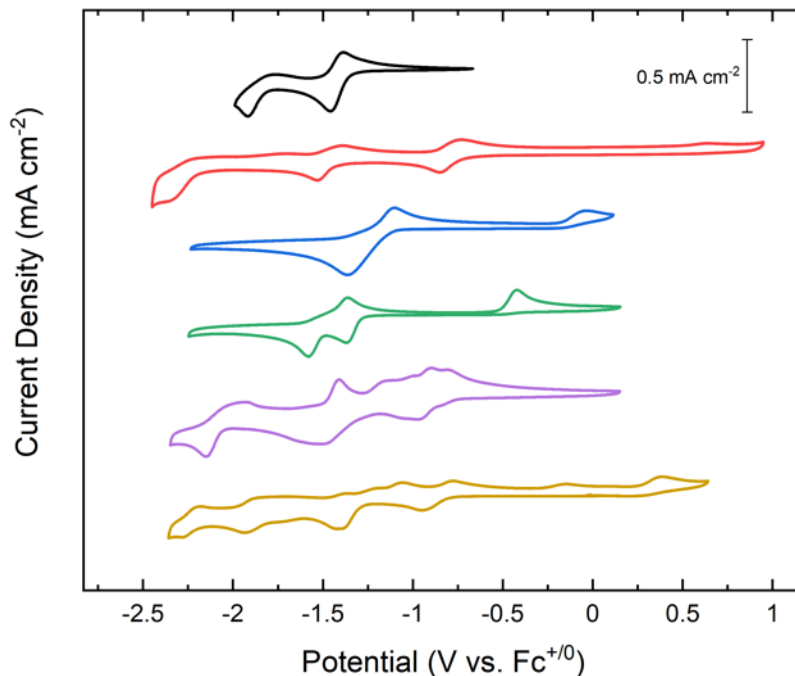

**Figure S24:** Stacked cyclic voltammograms (100 mV/s) of complexes **1-6** in 0.1M TBAPF<sub>6</sub>/MeCN solution. **1** (black), **2-syn + 2-anti** (red), **3** (blue), **4** (green), **5-syn + 5-anti** (purple), **6-syn + 6-anti** (gold).

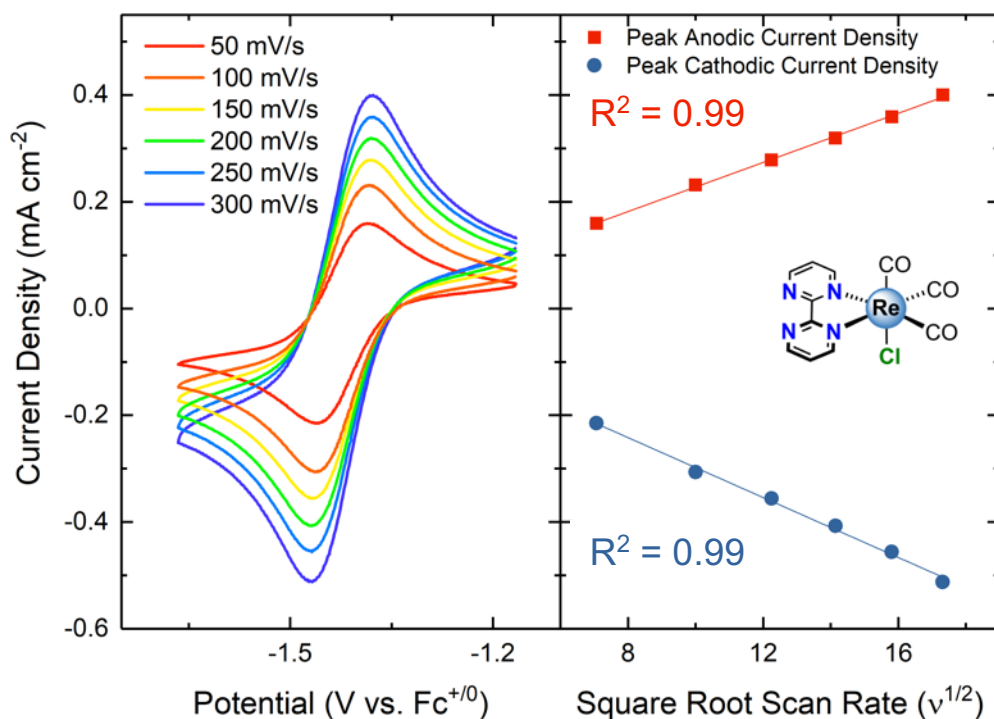

**Figure S25:** Scan rate dependence studies (left) and peak anodic and cathodic current density as a function of the square root of scan rate (right) for the first redox couple of complex **1**.

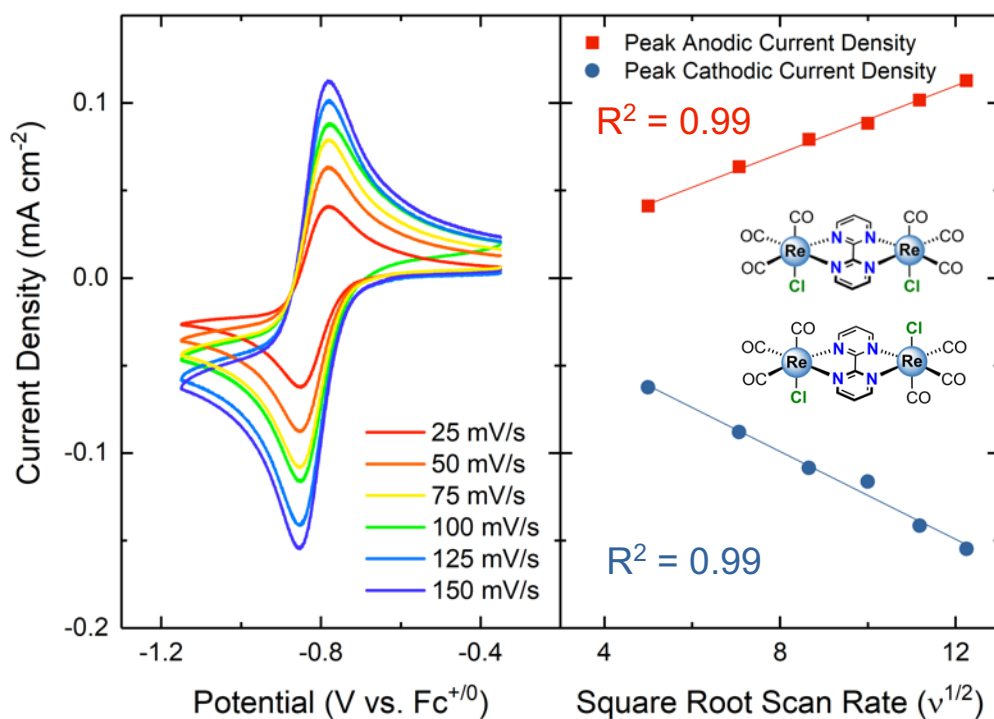

**Figure S26:** Scan rate dependence studies (left) and peak anodic and cathodic current density as a function of the square root of scan rate (right) for the first redox couple of complex **2-syn + 2-anti**.



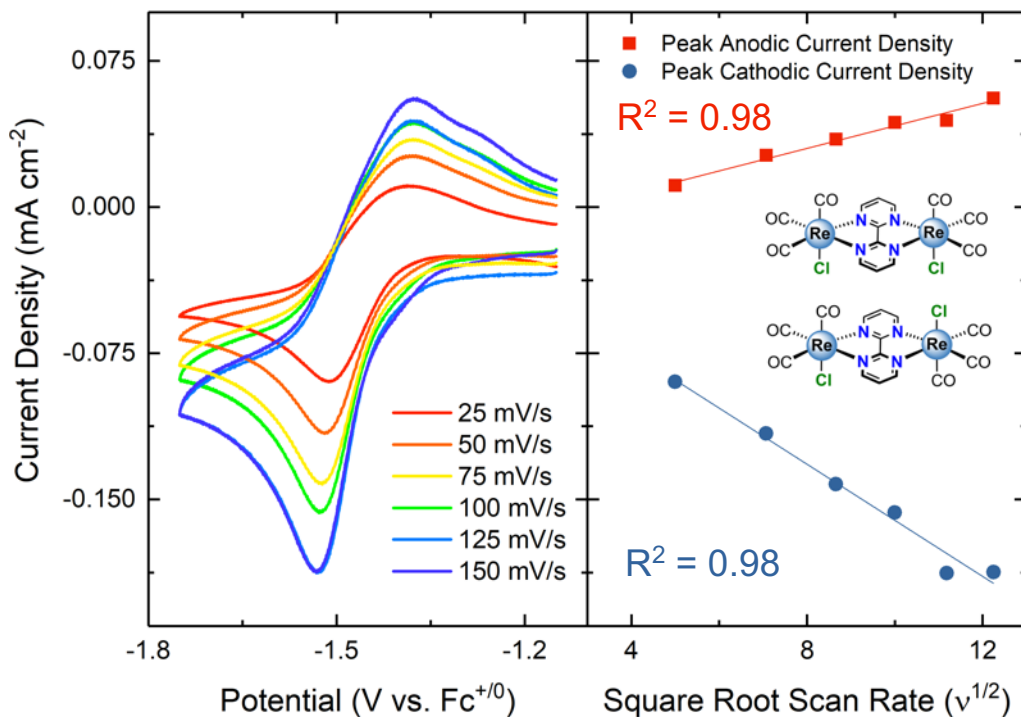

**Figure S27:** Scan rate dependence studies (left) and peak anodic and cathodic current density as a function of the square root of scan rate (right) for the second redox couple of complex **2-syn + 2-anti**.

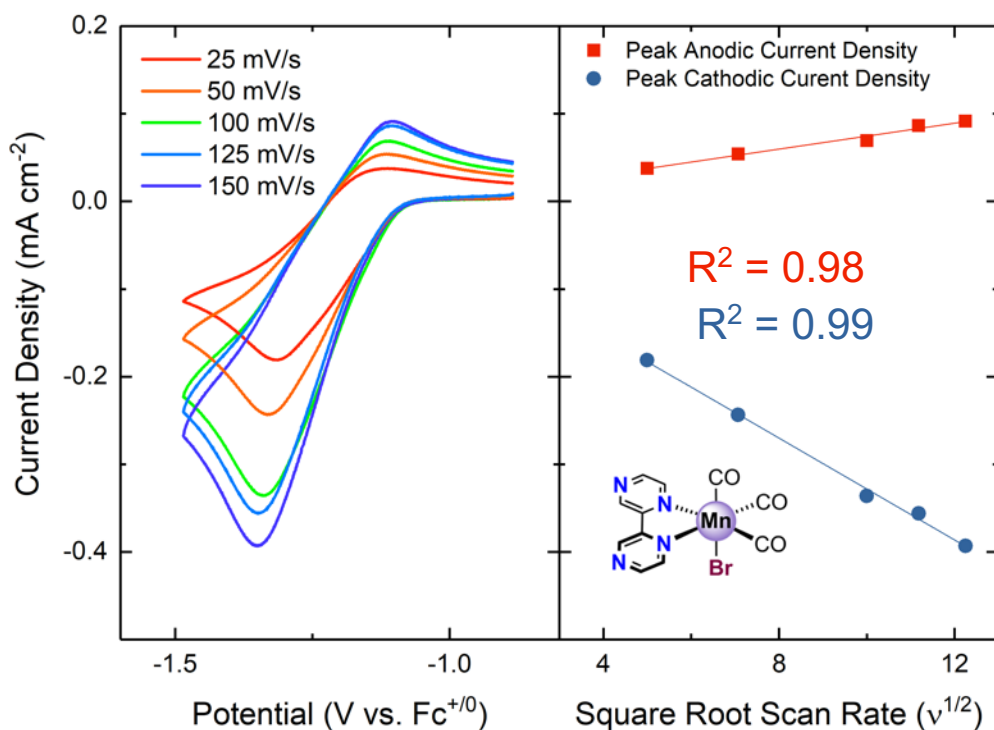

**Figure S28:** Scan rate dependence studies (left) and peak anodic and cathodic current density as a function of the square root of scan rate (right) for complex **3**.

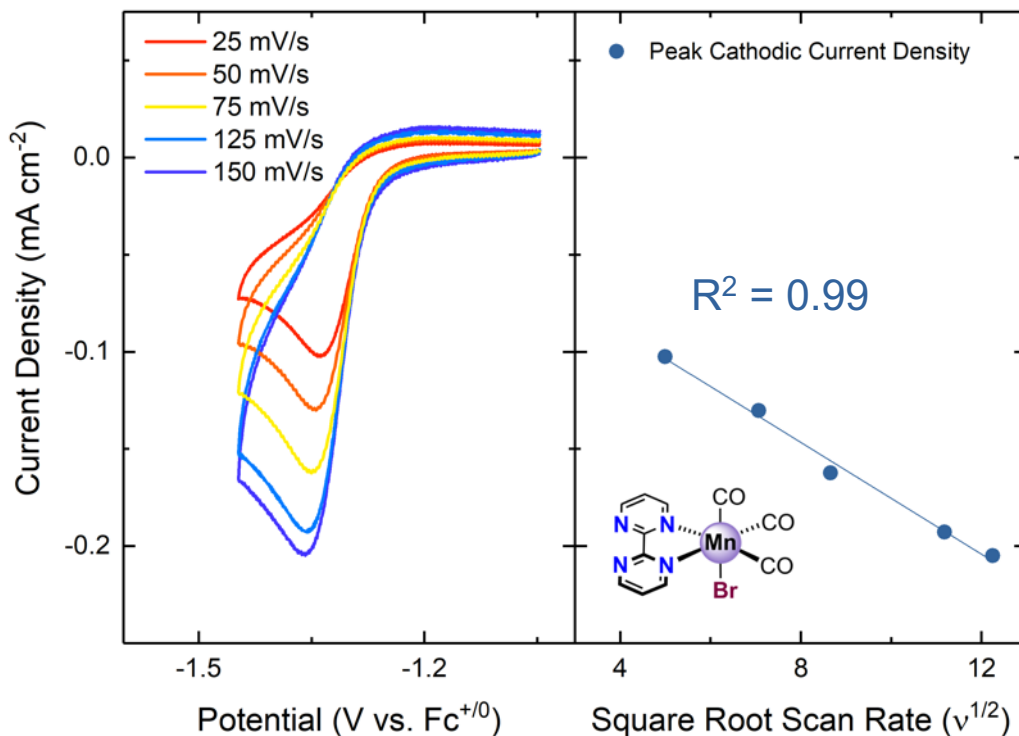

**Figure S29:** Scan rate dependence studies (left) and peak anodic and cathodic current density as a function of the square root of scan rate (right) for complex 4.

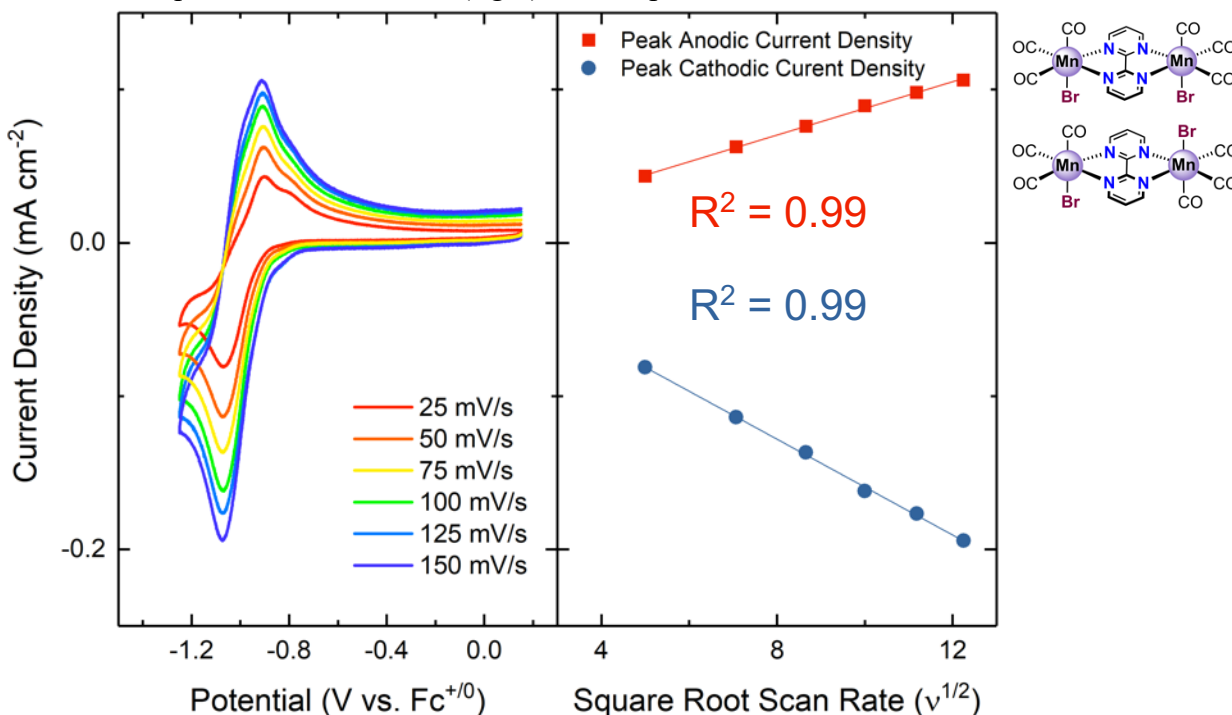

**Figure S30:** Scan rate dependence studies (left) and peak anodic and cathodic current density as a function of the square root of scan rate (right) for complex 5-syn + 5-anti.

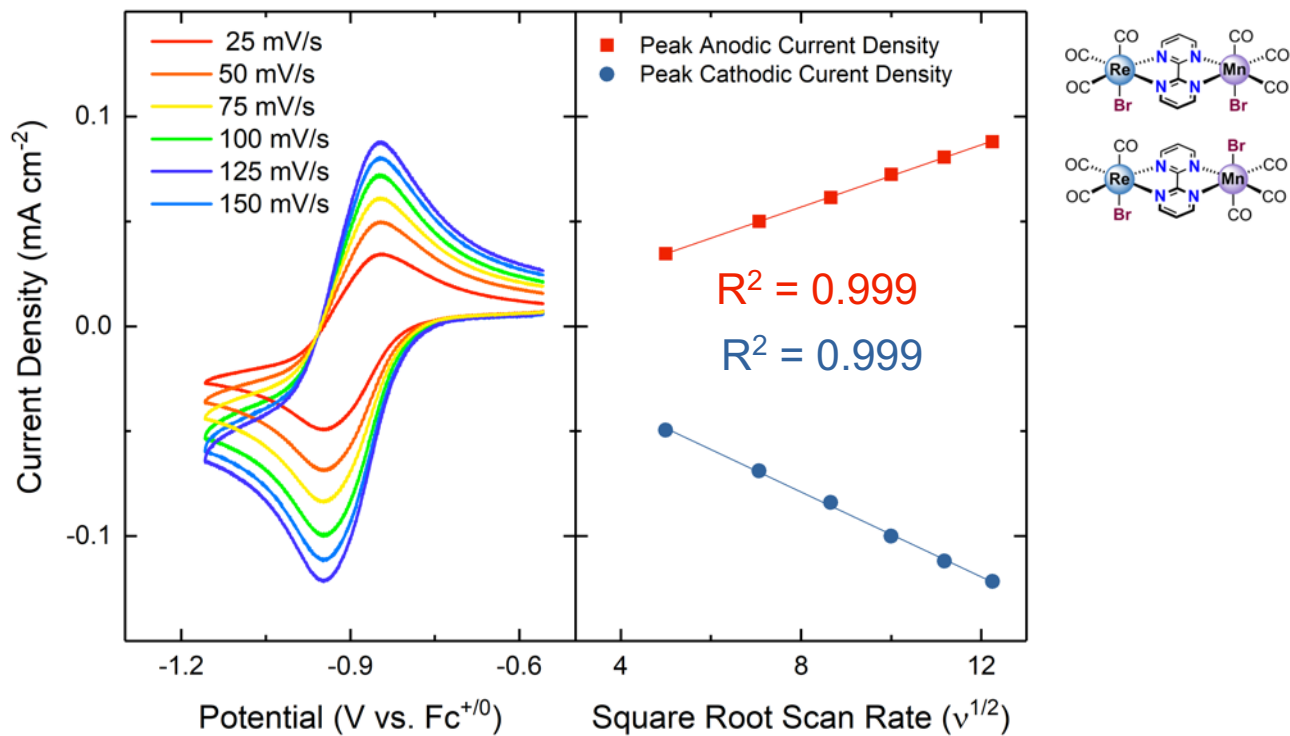

**Figure S31:** Scan rate dependence studies (left) and peak anodic and cathodic current density as a function of the square root of scan rate (right) for complex **6-syn + 6-anti**.

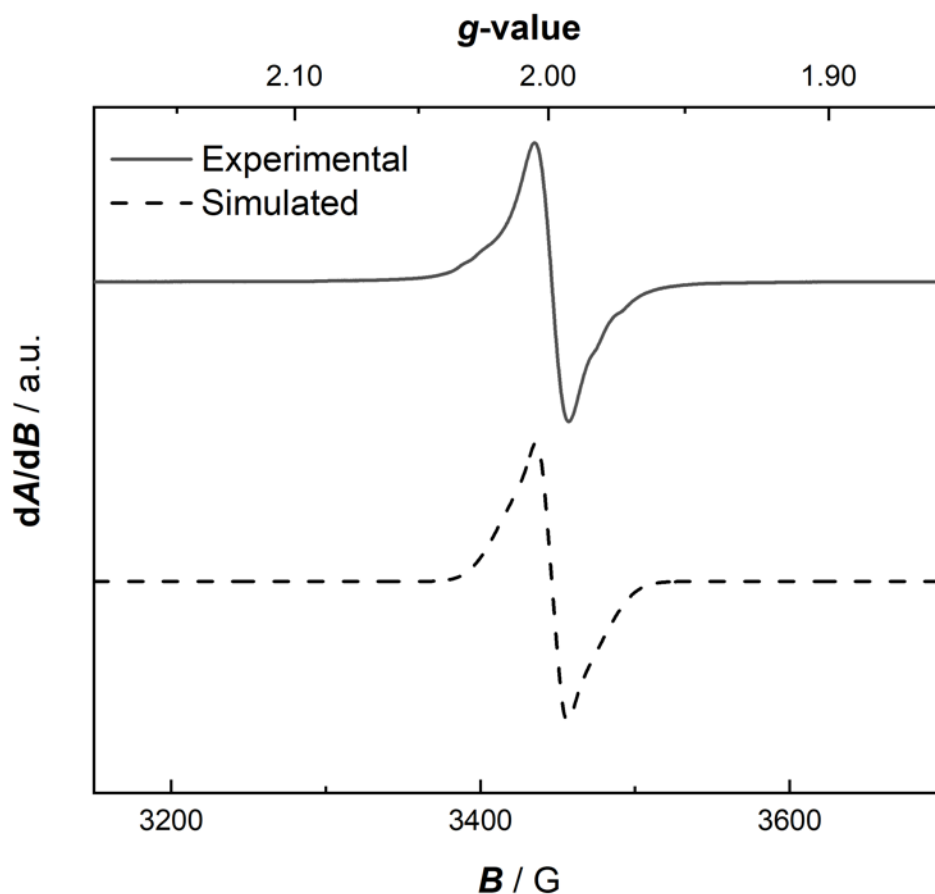

**Figure S32:** Experimental: perpendicular-mode X-band EPR spectrum of **2-syn + 2-anti** after reduction by one  $e^-$  using  $\text{Cp}_2\text{Co}$  to generate a singly reduced paramagnetic species *in situ* (toluene, Temperature = 20 K, Frequency = 9.6405 GHz, Power = 2 mW). Simulated: Easyspin simulation of EPR data; Best values:  $g_x = 1.99$ ,  $g_y = 2.01$ ,  $g_z = 1.98$ ,  $A_x = 43$  MHz,  $A_y = 50$  MHz,  $A_z = 15$  MHz,  $\text{HStrain}(x) = 1$  MHz,  $\text{HStrain}(y) = 100$  MHz,  $\text{HStrain}(z) = 100$  MHz, peak to peak line width ( $lwpp$ ) = 0.75, weight = 1.

## Crystallographic Information

### Refinement Details

#### X-ray Crystallographic Studies for **1**, **2-anti**, **3**, **4**, **5-syn**, **5-anti**, and **6-syn**

Crystals were mounted on polyimide MiTeGen loops with STP Oil Treatment and placed under a nitrogen stream. Low temperature (100 K) X-ray data were collected on a Bruker AXS D8 KAPPA diffractometer with an APEX II CCD detector and TRIUMPH graphite monochromator running at 50 kV and 30 mA with Mo radiation ( $K_{\alpha} = 0.71073 \text{ \AA}$ ) for **1** and on a Bruker AXS D8 VENTURE KAPPA diffractometer with PHOTON 100 CMOS detector and Helios focusing multilayer mirror optics running at 50 kV and 1 mA using Cu radiation ( $K_{\alpha} = 1.54178 \text{ \AA}$ ) for **5-syn** and **5-anti** and using Mo radiation ( $K_{\alpha} = 0.71073 \text{ \AA}$ ) for **2-anti**, **3**, **4**, and **6-syn**. Totals of 2374 (**1**), 2053 (**2-anti**), 2444 (**3**), 1206 (**4**), 1338 (**5-syn**), 2013 (**5-anti**), 884 (**6-syn**),  $0.5^{\circ}$  or  $1.0^{\circ}$ -wide  $\omega$ - or  $\phi$ -scan frames were collected with counting times of 10-20 seconds (**1**), 4-30 seconds (**2**), 1-10 seconds (**3**), 1-20 seconds (**4**), 5-60 seconds (**5-syn**), 1-15 seconds (**5-anti**), and 2-60 seconds (**6-syn**). Preliminary lattice constants were obtained with the Bruker Apex2 Software Suite.<sup>1</sup> Integrated reflection intensities for all compounds were produced using SAINT in the Bruker Apex2 Software Suite. Each data set was corrected empirically for variable absorption effects with SADABS<sup>2</sup> using equivalent reflections. The Bruker software package SHELXTL was used to solve each structure using intrinsic direct methods phasing. Final stages of weighted full-matrix least-squares refinement were conducted using  $F_o^2$  data with SHELXTL<sup>3</sup> or the Olex2 software package equipped with XL<sup>4</sup>. All non-hydrogen atoms were refined anisotropically. All hydrogen atoms were included into the model at geometrically calculated positions and refined using a riding model. The isotropic displacement parameters of all hydrogen atoms were fixed to 1.2 times the  $U$  value of the atoms they are linked to. The relevant crystallographic and structure refinement data for all seven structures are given in Table S1.

**Table S1: Crystal Refinement Data**

|                                         | <b>1</b> (a15100)                                                 | <b>2-anti</b> (p15249)                                                                       | <b>3</b> (p15315)                                                |
|-----------------------------------------|-------------------------------------------------------------------|----------------------------------------------------------------------------------------------|------------------------------------------------------------------|
| <b>CCDC accession code</b>              | 2005316                                                           | 2005317                                                                                      | 2005320                                                          |
| <b>Empirical formula</b>                | C <sub>11</sub> H <sub>6</sub> ClN <sub>4</sub> O <sub>3</sub> Re | C <sub>14</sub> H <sub>6</sub> Cl <sub>2</sub> N <sub>4</sub> O <sub>6</sub> Re <sub>2</sub> | C <sub>11</sub> H <sub>6</sub> BrMnN <sub>4</sub> O <sub>3</sub> |
| <b>Formula weight</b>                   | 463.85                                                            | 769.53                                                                                       | 377.05                                                           |
| <b>Temperature</b>                      | 100 K                                                             | 100 K                                                                                        | 100 K                                                            |
| <b>Wavelength</b>                       | 0.71073 Å                                                         | 0.71073 Å                                                                                    | 0.71073 Å                                                        |
| <b>Crystal system</b>                   | monoclinic                                                        | monoclinic                                                                                   | triclinic                                                        |
| <b>Space group</b>                      | <i>P2<sub>1</sub>/c</i> (No. 14)                                  | <i>P2<sub>1</sub>/c</i> (No. 14)                                                             | <i>P-1</i> (No. 2)                                               |
| <b>a</b>                                | 6.2872(3) Å                                                       | 6.3386(3) Å                                                                                  | 6.6093(3) Å                                                      |
| <b>b</b>                                | 14.9679(7) Å                                                      | 11.9351(6) Å                                                                                 | 6.6618(3) Å                                                      |
| <b>c</b>                                | 13.4775(7) Å                                                      | 12.3347(6) Å                                                                                 | 14.8504(8) Å                                                     |
| <b>α</b>                                | 90°                                                               | 90°                                                                                          | 102.3575(17)°                                                    |
| <b>β</b>                                | 102.408(2)°                                                       | 97.6407(17)°                                                                                 | 93.1195(18)°                                                     |
| <b>γ</b>                                | 90°                                                               | 90°                                                                                          | 102.3828(17)°                                                    |
| <b>Volume</b>                           | 1238.69(11) Å <sup>3</sup>                                        | 924.86(8) Å <sup>3</sup>                                                                     | 620.40(5) Å <sup>3</sup>                                         |
| <b>Z</b>                                | 4                                                                 | 2                                                                                            | 2                                                                |
| <b>Density (calculated)</b>             | 2.487 g/cm <sup>3</sup>                                           | 2.763 g/cm <sup>3</sup>                                                                      | 2.018 g/cm <sup>3</sup>                                          |
| <b>Absorption coefficient</b>           | 10.038 mm <sup>-1</sup>                                           | 13.406 mm <sup>-1</sup>                                                                      | 4.296 mm <sup>-1</sup>                                           |
| <b>F(000)</b>                           | 864                                                               | 700                                                                                          | 368                                                              |
| <b>Crystal size</b>                     | 0.4 x 0.06 x 0.02 mm <sup>3</sup>                                 | 0.06 x 0.04 x 0.02 mm <sup>3</sup>                                                           | 0.300 x 0.150 x 0.100 mm <sup>3</sup>                            |
| <b>Number of data frames/time</b>       | 2374/10-20 seconds                                                | 2053/4-30 seconds                                                                            | 2444/1-10 seconds                                                |
| <b>Theta range</b>                      | 2.06 to 29.992°                                                   | 2.385 to 24.992°                                                                             | 3.173 to 36.362°                                                 |
| <b>Index ranges</b>                     | -8 ≤ h ≤ 8, -21 ≤ k ≤ 21, -18 ≤ l ≤ 18                            | -7 ≤ h ≤ 7, -14 ≤ k ≤ 14, -14 ≤ l ≤ 14                                                       | -10 ≤ h ≤ 10, -10 ≤ k ≤ 11, -24 ≤ l ≤ 24                         |
| <b>Reflections collected</b>            | 32945                                                             | 21581                                                                                        | 31855                                                            |
| <b>Independent reflections</b>          | 3602 [R <sub>int</sub> = 0.039]                                   | 1634 [R <sub>int</sub> = 0.055]                                                              | 5964 [R <sub>int</sub> = 0.038]                                  |
| <b>Completeness/θ<sub>max</sub></b>     | 100%/25.000°                                                      | 100%/24.992°                                                                                 | 99.9%/25.242°                                                    |
| <b>Absorption correction</b>            | Multi-scan                                                        | Multi-scan                                                                                   | Multi-scan                                                       |
| <b>Max. and min. transmission</b>       | 1.000 and 0.630                                                   | 1.000 and 0.852                                                                              | 0.7471 and 0.5920                                                |
| <b>Refinement method</b>                | Full-matrix least-squares on F <sup>2</sup>                       | Full-matrix least-squares on F <sup>2</sup>                                                  | Full-matrix least-squares on F <sup>2</sup>                      |
| <b>Data / restraints / parameters</b>   | 3602 / 0 / 193                                                    | 1634 / 0 / 145                                                                               | 5964 / 0 / 181                                                   |
| <b>Goodness-of-fit on F<sup>2</sup></b> | 1.252                                                             | 1.401                                                                                        | 1.040                                                            |
| <b>Final R indices [I &gt; 2σ(I)]</b>   | R <sub>1</sub> = 0.0212, wR <sub>2</sub> = 0.0453                 | R <sub>1</sub> = 0.0267, wR <sub>2</sub> = 0.0478                                            | R <sub>1</sub> = 0.0289, wR <sub>2</sub> = 0.0572                |
| <b>R indices (all data)</b>             | R <sub>1</sub> = 0.0226, wR <sub>2</sub> = 0.0457                 | R <sub>1</sub> = 0.0304, wR <sub>2</sub> = 0.0485                                            | R <sub>1</sub> = 0.0411, wR <sub>2</sub> = 0.0605                |
| <b>Largest diff. peak and hole</b>      | 1.19 and -0.91 e <sup>-</sup> /Å <sup>3</sup>                     | 1.57 and -1.79 e <sup>-</sup> /Å <sup>3</sup>                                                | 0.778 and -0.778 e <sup>-</sup> /Å <sup>3</sup>                  |

|                                         | <b>4</b> (p15260)                                                | <b>5-syn</b> (p15288)                                                                         | <b>5-anti</b> (p15287)                                                                       |
|-----------------------------------------|------------------------------------------------------------------|-----------------------------------------------------------------------------------------------|----------------------------------------------------------------------------------------------|
| <b>CCDC accession code</b>              | 2005318                                                          | 2005315                                                                                       | 2005321                                                                                      |
| <b>Empirical formula</b>                | C <sub>11</sub> H <sub>6</sub> BrMnN <sub>4</sub> O <sub>3</sub> | C <sub>17</sub> H <sub>12</sub> Br <sub>2</sub> Mn <sub>2</sub> N <sub>4</sub> O <sub>7</sub> | C <sub>14</sub> H <sub>6</sub> Br <sub>2</sub> Mn <sub>2</sub> N <sub>4</sub> O <sub>6</sub> |
| <b>Formula weight</b>                   | 377.05                                                           | 647.96                                                                                        | 595.93                                                                                       |
| <b>Temperature</b>                      | 100 K                                                            | 100 K                                                                                         | 100 K                                                                                        |
| <b>Wavelength</b>                       | 0.71073 Å                                                        | 1.54178 Å                                                                                     | 1.54178 Å                                                                                    |
| <b>Crystal system</b>                   | monoclinic                                                       | orthorhombic                                                                                  | triclinic                                                                                    |
| <b>Space group</b>                      | <i>P2<sub>1</sub>/c</i> (No. 14)                                 | <i>Cmcm</i> (No. 63)                                                                          | <i>P-1</i> (No. 2)                                                                           |
| <b>a</b>                                | 6.4216(2) Å                                                      | 17.597(3) Å                                                                                   | 6.4380(6) Å                                                                                  |
| <b>b</b>                                | 14.7565(6) Å                                                     | 10.830(2) Å                                                                                   | 8.3336(7) Å                                                                                  |
| <b>c</b>                                | 13.5124(5) Å                                                     | 11.8313(18) Å                                                                                 | 9.4980(9) Å                                                                                  |
| <b>α</b>                                | 90°                                                              | 90°                                                                                           | 98.880(7)°                                                                                   |
| <b>β</b>                                | 102.0331(12)°                                                    | 90°                                                                                           | 100.604(7)°                                                                                  |
| <b>γ</b>                                | 90°                                                              | 90°                                                                                           | 96.117(7)°                                                                                   |
| <b>Volume</b>                           | 1252.30(8) Å <sup>3</sup>                                        | 2254.8(7) Å <sup>3</sup>                                                                      | 490.08(8) Å <sup>3</sup>                                                                     |
| <b>Z</b>                                | 4                                                                | 4                                                                                             | 1                                                                                            |
| <b>Density (calculated)</b>             | 2.000 g/cm <sup>3</sup>                                          | 1.909 g/cm <sup>3</sup>                                                                       | 2.019 g/cm <sup>3</sup>                                                                      |
| <b>Absorption coefficient</b>           | 4.257 mm <sup>-1</sup>                                           | 13.687 mm <sup>-1</sup>                                                                       | 15.626 mm <sup>-1</sup>                                                                      |
| <b>F(000)</b>                           | 736                                                              | 1248.0                                                                                        | 286                                                                                          |
| <b>Crystal size</b>                     | 0.250 x 0.100 x 0.050 mm <sup>3</sup>                            | 0.1 x 0.03 x 0.03 mm <sup>3</sup>                                                             | 0.070 x 0.050 x 0.030 mm <sup>3</sup>                                                        |
| <b>Number of data frames/time</b>       | 1206/1-20 seconds                                                | 1338/5-60 seconds                                                                             | 2013/1-15 seconds                                                                            |
| <b>Theta range</b>                      | 3.083 to 36.307°                                                 | 4.794 to 74.214°                                                                              | 4.814 to 72.057°                                                                             |
| <b>Index ranges</b>                     | -10 ≤ h ≤ 10, -24 ≤ k ≤ 24, -22 ≤ l ≤ 22                         | -21 ≤ h ≤ 19, -13 ≤ k ≤ 11, -14 ≤ l ≤ 9                                                       | -6 ≤ h ≤ 7, -10 ≤ k ≤ 10, -11 ≤ l ≤ 11                                                       |
| <b>Reflections collected</b>            | 28709                                                            | 4267                                                                                          | 5479                                                                                         |
| <b>Independent reflections</b>          | 6048 [R <sub>int</sub> = 0.039]                                  | 1178 [R <sub>int</sub> = 0.109]                                                               | 1911 [R <sub>int</sub> = 0.092]                                                              |
| <b>Completeness/θ<sub>max</sub></b>     | 99.9%/25.242°                                                    | 97.9%/66.00°                                                                                  | 99.7%/67.679°                                                                                |
| <b>Absorption correction</b>            | Multi-scan                                                       | None                                                                                          | Multi-scan                                                                                   |
| <b>Max. and min. transmission</b>       | 0.7474 and 0.5901                                                | 0.7538 and 0.5415                                                                             | 0.7538 and 0.5580                                                                            |
| <b>Refinement method</b>                | Full-matrix least-squares on F <sup>2</sup>                      | Full-matrix least-squares on F <sup>2</sup>                                                   | Full-matrix least-squares on F <sup>2</sup>                                                  |
| <b>Data / restraints / parameters</b>   | 6048 / 0 / 181                                                   | 1178 / 29 / 93                                                                                | 1911 / 0 / 127                                                                               |
| <b>Goodness-of-fit on F<sup>2</sup></b> | 1.045                                                            | 1.065                                                                                         | 1.062                                                                                        |
| <b>Final R indices [I &gt; 2σ(I)]</b>   | R <sub>1</sub> = 0.0309, wR <sub>2</sub> = 0.0638                | R <sub>1</sub> = 0.0616, wR <sub>2</sub> = 0.1333                                             | R <sub>1</sub> = 0.0702, wR <sub>2</sub> = 0.1569                                            |
| <b>R indices (all data)</b>             | R <sub>1</sub> = 0.0476, wR <sub>2</sub> = 0.0687                | R <sub>1</sub> = 0.1106, wR <sub>2</sub> = 0.1538                                             | R <sub>1</sub> = 0.1034, wR <sub>2</sub> = 0.1759                                            |
| <b>Largest diff. peak and hole</b>      | 0.969 and -0.693 e <sup>-</sup> /Å <sup>3</sup>                  | 0.97 and -1.13 e <sup>-</sup> /Å <sup>3</sup>                                                 | 1.451 and -0.966 e <sup>-</sup> /Å <sup>3</sup>                                              |

| <b>6-syn (p15317)</b>                   |                                                                                    |
|-----------------------------------------|------------------------------------------------------------------------------------|
| <b>CCDC accession code</b>              | 2005319                                                                            |
| <b>Empirical formula</b>                | C <sub>17</sub> H <sub>12</sub> Br <sub>2</sub> MnN <sub>4</sub> O <sub>7</sub> Re |
| <b>Formula weight</b>                   | 785.27                                                                             |
| <b>Temperature</b>                      | 100 K                                                                              |
| <b>Wavelength</b>                       | 0.71073 Å                                                                          |
| <b>Crystal system</b>                   | orthorhombic                                                                       |
| <b>Space group</b>                      | <i>Cmcm</i> (No 63)                                                                |
| <b>a</b>                                | 17.6165(8) Å                                                                       |
| <b>b</b>                                | 10.9052(5) Å                                                                       |
| <b>c</b>                                | 11.8240(6) Å                                                                       |
| <b>α</b>                                | 90°                                                                                |
| <b>β</b>                                | 90°                                                                                |
| <b>γ</b>                                | 90°                                                                                |
| <b>Volume</b>                           | 2271.53(19) Å <sup>3</sup>                                                         |
| <b>Z</b>                                | 4                                                                                  |
| <b>Density (calculated)</b>             | 2.296 g/cm <sup>3</sup>                                                            |
| <b>Absorption coefficient</b>           | 9.444 mm <sup>-1</sup>                                                             |
| <b>F(000)</b>                           | 1472                                                                               |
| <b>Crystal size</b>                     | 0.100 x 0.030 x 0.030 mm <sup>3</sup>                                              |
| <b>Number of data frames/time</b>       | 884/2-60 seconds                                                                   |
| <b>Theta range</b>                      | 2.196 to 30.501°                                                                   |
| <b>Index ranges</b>                     | -22 ≤ h ≤ 25, -14 ≤ k ≤ 14, -16 ≤ l ≤ 15                                           |
| <b>Reflections collected</b>            | 15274                                                                              |
| <b>Independent reflections</b>          | 1811 [R <sub>int</sub> = 0.056]                                                    |
| <b>Completeness/θ<sub>max</sub></b>     | 99.9%/25.242°                                                                      |
| <b>Absorption correction</b>            | Multi-scan                                                                         |
| <b>Max. and min. transmission</b>       | 0.7466 and 0.5762                                                                  |
| <b>Refinement method</b>                | Full-matrix least-squares on F <sup>2</sup>                                        |
| <b>Data / restraints / parameters</b>   | 1811 / 199 / 126                                                                   |
| <b>Goodness-of-fit on F<sup>2</sup></b> | 1.060                                                                              |
| <b>Final R indices [I &gt; 2σ(I)]</b>   | R <sub>1</sub> = 0.0286, wR <sub>2</sub> = 0.0489                                  |
| <b>R indices (all data)</b>             | R <sub>1</sub> = 0.0448, wR <sub>2</sub> = 0.0519                                  |
| <b>Largest diff. peak and hole</b>      | 0.892 and -1.442 e <sup>-</sup> /Å <sup>3</sup>                                    |



**Special Refinement Details for 1.**

Complex 1 crystallizes in the monoclinic space group  $P2_1/c$ . The crystal exhibits disorder in regard to the axial CO and axial Cl. Specifically, the disorder was modeled by refining the relative occupancies of C11 and C11a, giving a ratio of 94:6. Additionally, refinement of the relative occupancies of O3 and O3a revealed a ratio of 94:6.

### Solid-State Structure of Complex 1.

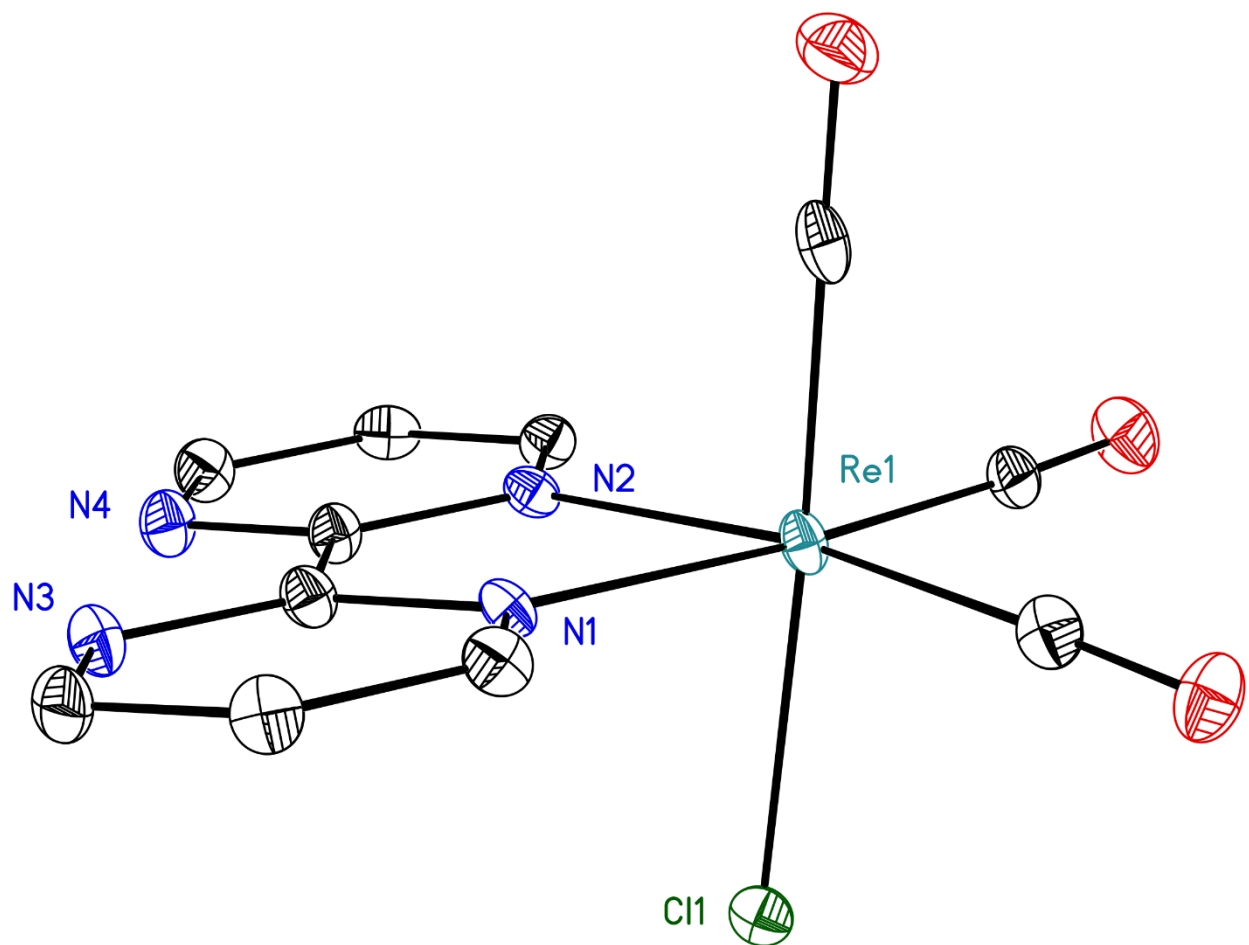

**Figure S33.** Solid-state structure of complex **1**. Partial occupancy CO and Cl omitted for clarity. Hydrogen atoms are omitted for clarity. Displacement ellipsoids are shown at the 50% probability level.

### Full Solid-state Structure of Complex 1.

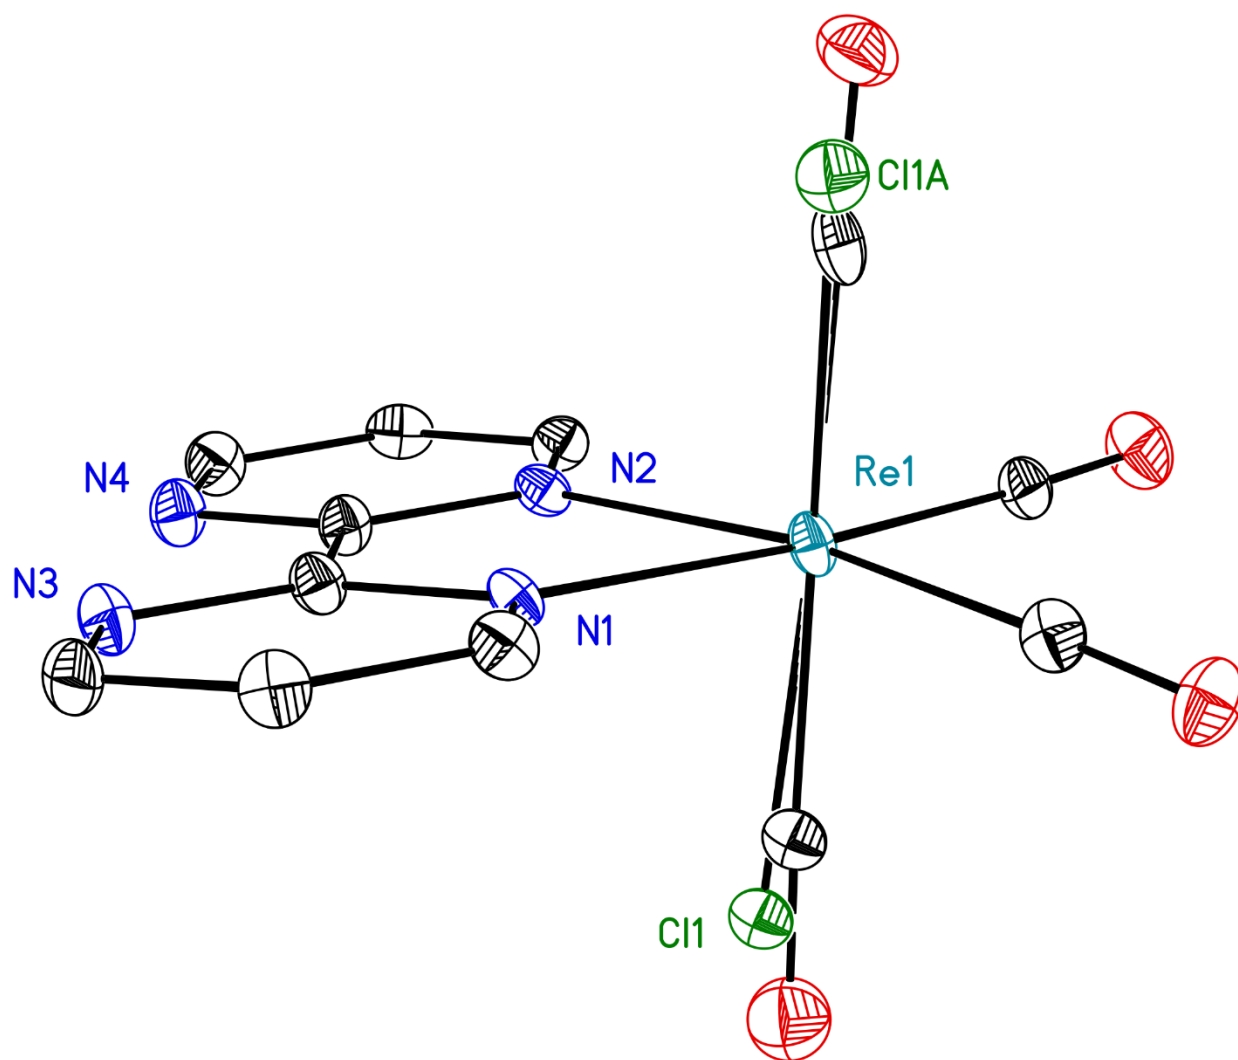

**Figure S34.** Full solid-state structure of complex 1. Hydrogen atoms are omitted for clarity. Displacement ellipsoids are shown at the 50% probability level.

### Special Refinement Details for 2-anti.

Complex **2-anti** crystallizes in the monoclinic space group  $P2_1/C$ . The crystal exhibits disorder in regard to the axial CO and axial Cl ligands. Specifically, the disorder was modeled by refining the relative occupancies of C11 and C11A, giving a ratio of 80:20. Additionally, refinement of the relative occupancies of C7 and C7A, as well as O3 and O3A, revealed a ratio of 80:20.

### Solid-State Structure of Complex 2-anti.

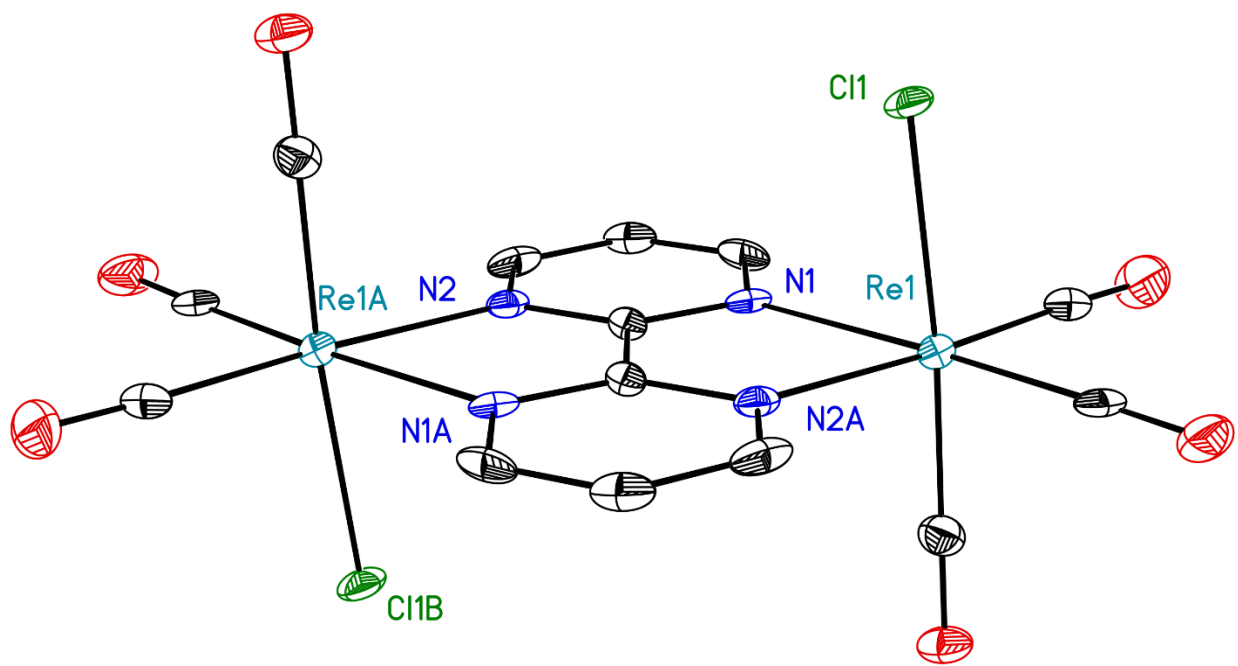

**Figure S35:** Solid-state structure of complex **2-anti**. Partial occupancy Cl1A, Cl1C, C7A, O3A, C7AA, and O3AA atoms are omitted for clarity. Hydrogen atoms are omitted for clarity. Displacement ellipsoids are shown at the 50% probability level.

### Full Solid-State Structure of Complex 2-anti.

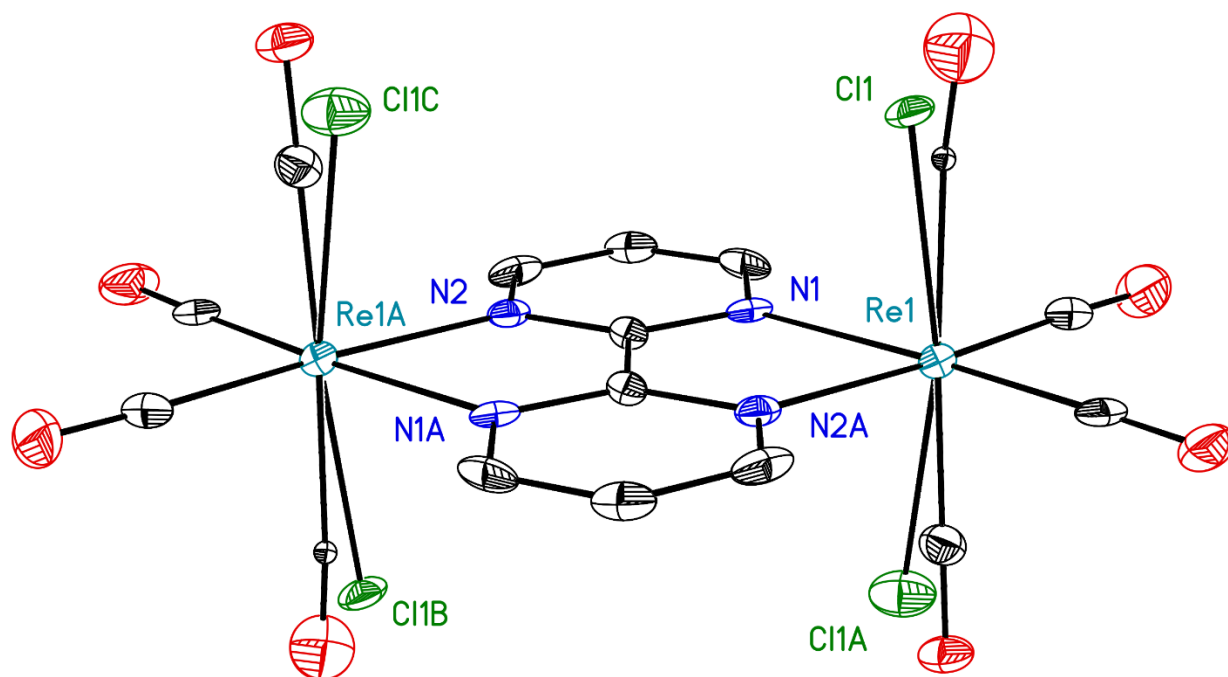

**Figure S36:** Full solid-state structure of complex **2-anti**, showing admixture of **2-syn** that is also present in the unit cell due to packing disorder. Hydrogen atoms are omitted for clarity. Displacement ellipsoids are shown at the 50% probability level.

### Special Refinement Details for 3.

No special refinement was required.

### Full Solid-State Structure of Complex 3.

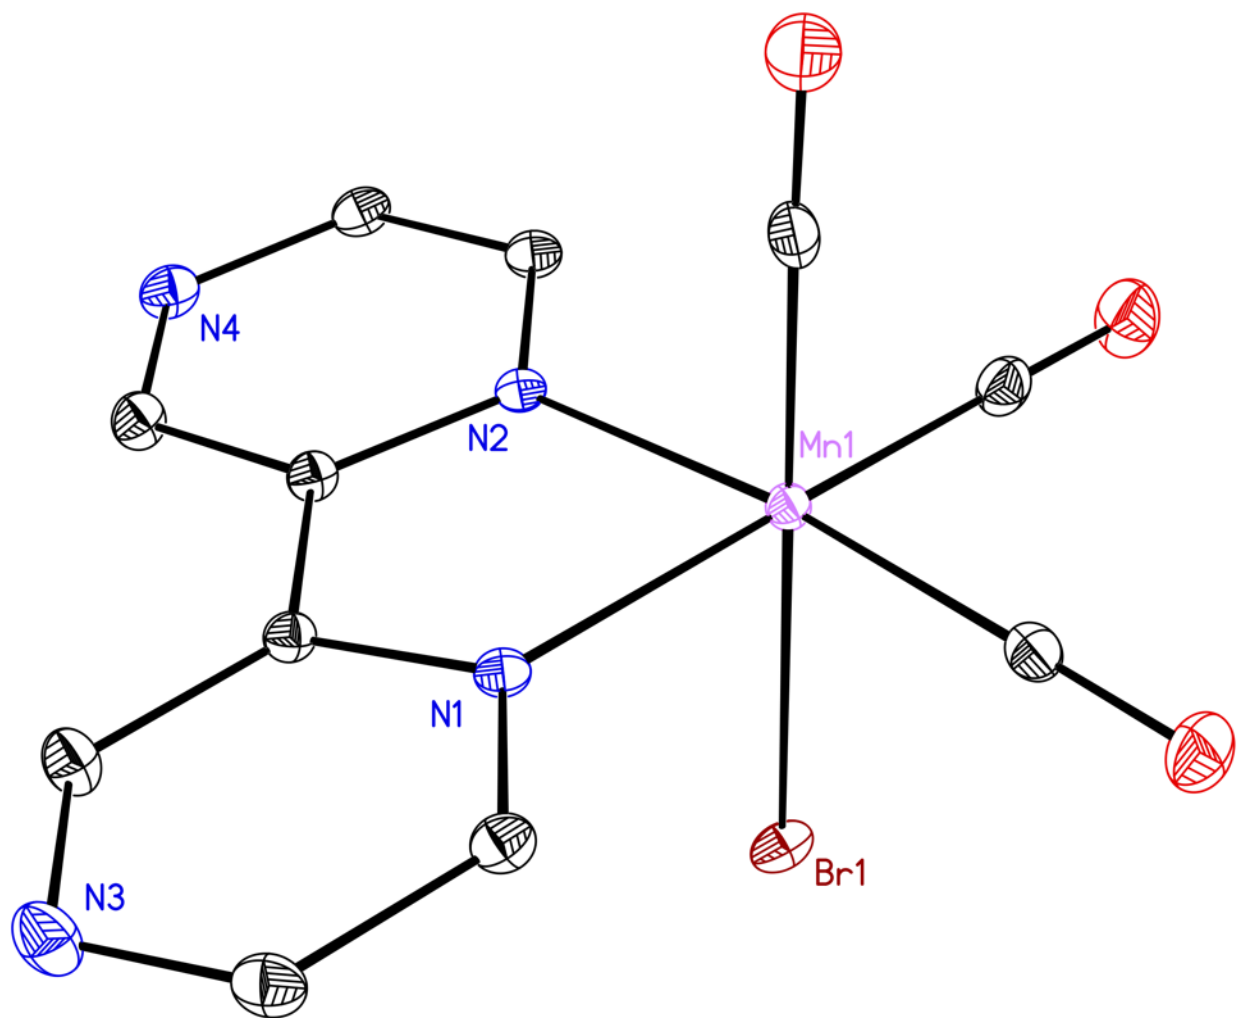

**Figure S37.** Full solid-state structure of complex 3. Hydrogen atoms are omitted for clarity. Displacement ellipsoids are shown at the 50% probability level.

**Special Refinement Details for 4.**

Complex 4 crystallizes in the monoclinic space group  $P2_1/c$  with one molecule in the asymmetric unit. The highest electron density maximum is located in a position consistent with a bromine disordered with carbon monoxide (C1 and O11). This disorder was not modeled because the occupancy of this bromine refined to less than 5% and no partially occupied carbon monoxide could be located in the bromine position (Br1).



### Full Solid-State Structure of Complex 4.

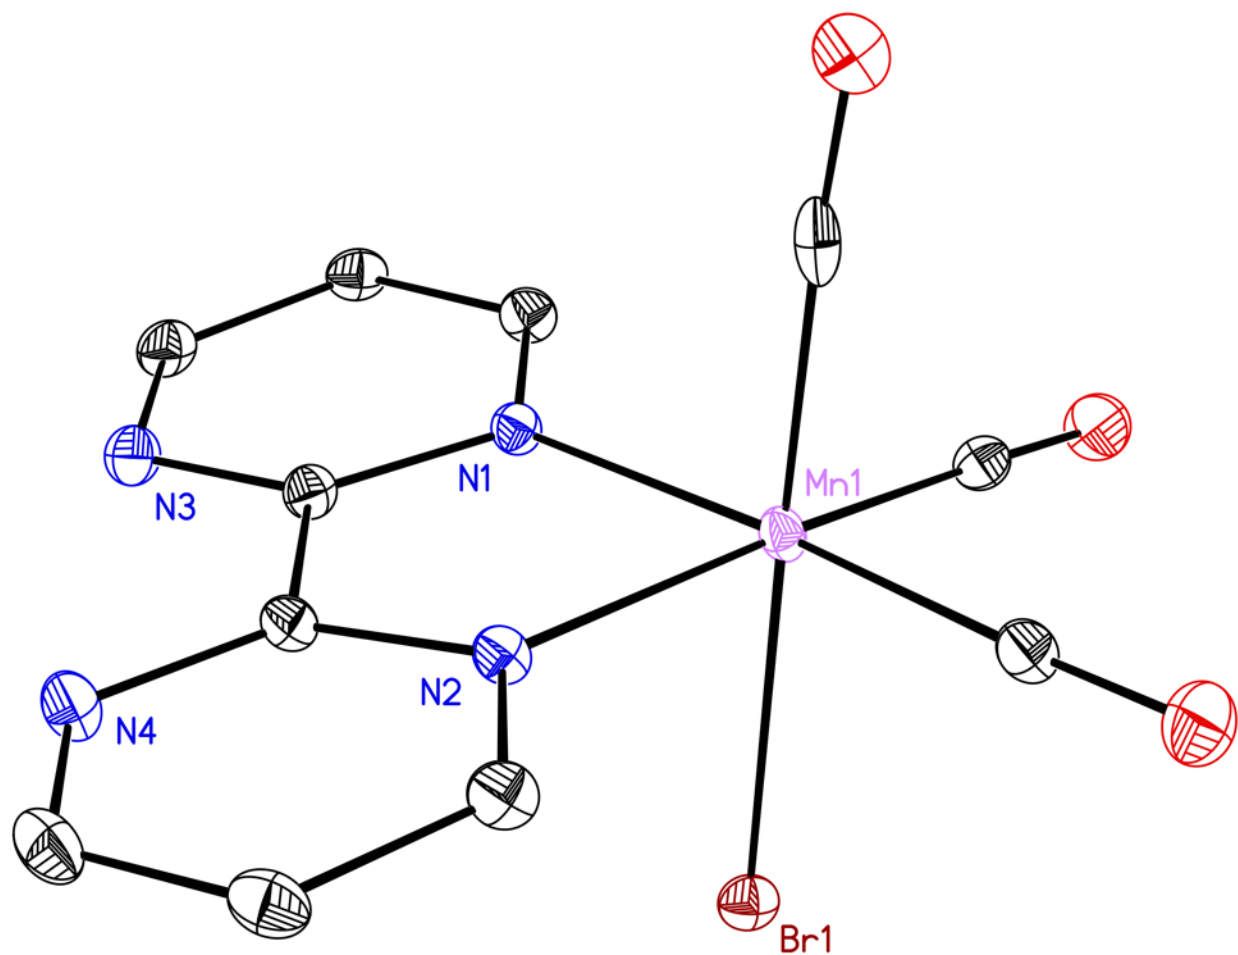

**Figure S38:** Full solid-state structure of complex 4. Hydrogen atoms are omitted for clarity. Displacement ellipsoids are shown at the 50% probability level.

### Special Refinement Details for 5-syn.

Complex **5-syn** crystallizes in the orthorhombic space group *Cmcm* with one quarter of a molecule in the asymmetric unit along with a quarter of an acetone. The occupancy of the acetone molecule was decreased to a quarter because it is located on multiple symmetry elements (mirrors and two-fold rotation axis). The acetone was refined with the help of similarity restraints on the 1,2- and 1,3-distances and displacement parameters as well as rigid bond restraints for anisotropic displacement parameters. In addition, the C-C distances were restrained to be 1.51(4) Å and all atoms were restrained to be flat. The quality of this crystal is relatively poor because it appeared to decompose over the course of data collection, possibly due to light exposure.

### Solid-State Structure of Complex 5-syn.

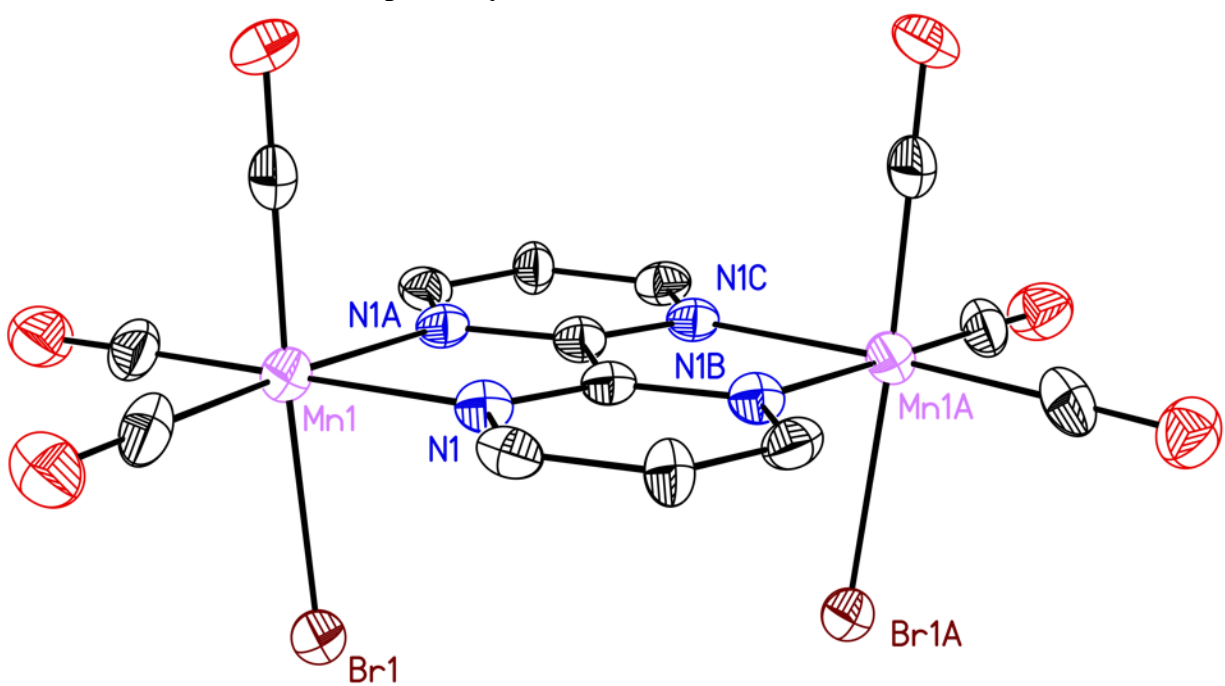

**Figure S39:** Solid-state structure of complex **5-syn**. Hydrogen atoms and a disordered acetone molecule are omitted for clarity. Displacement ellipsoids are shown at the 50% probability level.

### Full Solid-State Structure of Complex 5-syn.

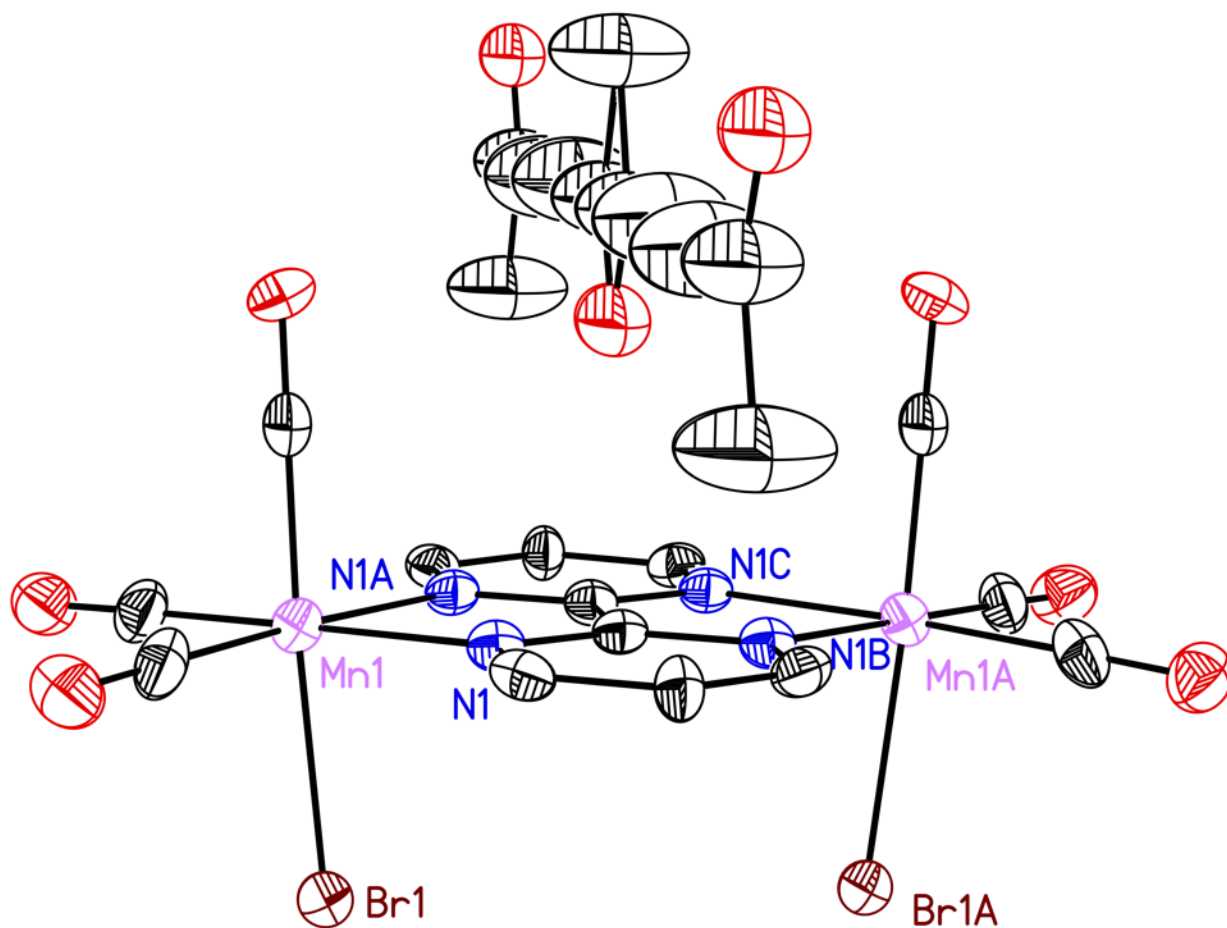

**Figure S40:** Solid-state structure of complex **5-syn**. Hydrogen are omitted for clarity. Displacement ellipsoids are shown at the 50% probability level.

### Special Refinement Details for 5-anti.

No special refinement was required.

### Full Solid-State Structure of Complex 5-anti.

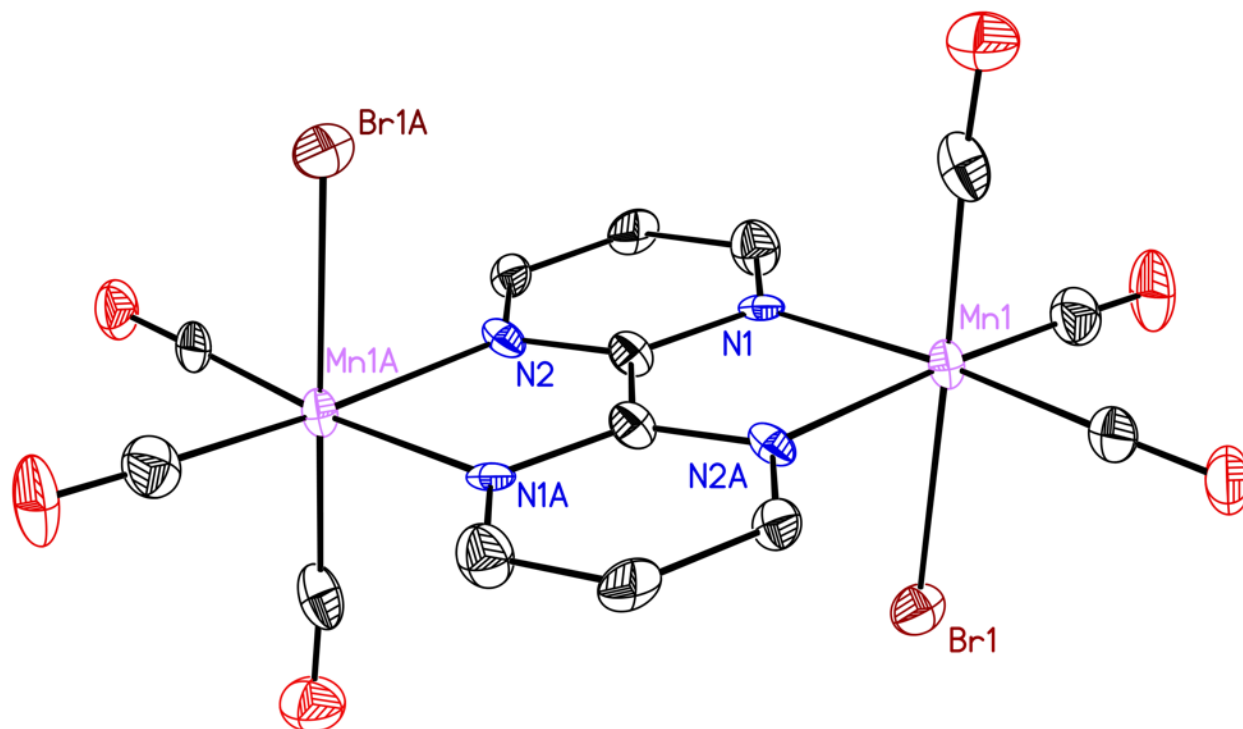

**Figure 41:** Full solid-state structure of **5-anti**. Hydrogen are omitted for clarity. Displacement ellipsoids are shown at the 50% probability level.

### Special Refinement Details for 6-syn.

Compound **6-syn** crystallizes in the orthorhombic space group *Cmcm* with a quarter of a molecule in the asymmetric unit along with a quarter of an acetone. All disordered atoms were refined with the help of similarity restraints on the 1,2- and 1,3-distances and displacement parameters as well as rigid or enhanced rigid bond restraints for anisotropic displacement parameters. The molecule is located on multiple symmetry elements (mirror planes and a 2-fold rotation axis). Due to this situation, only one metal position is present in the asymmetric unit which was modeled as a mixture of Mn and Re. Refinement of the relative occupancies of Mn and Re gave a ratio of approximately 49.4:50.6. For the final refinement the occupancies of Mn and Re were constrained to be 50:50 and the anisotropic displacement parameters were constrained to be equal. As a result of the Mn-Re disorder, the carbonyl ligands were also disordered.

The occupancy of the acetone molecule was decreased to a quarter because it is located on multiple symmetry elements (mirror planes and two-fold rotation axis). The acetone was refined with the help of similarity restraints on the 1,2- and 1,3-distances and displacement parameters as well as rigid bond restraints for anisotropic displacement parameters. In addition, the C-C distances were restrained to be 1.51(4) Å and all atoms were restrained to be flat.

### Solid-State Structure of Complex **6-syn**.

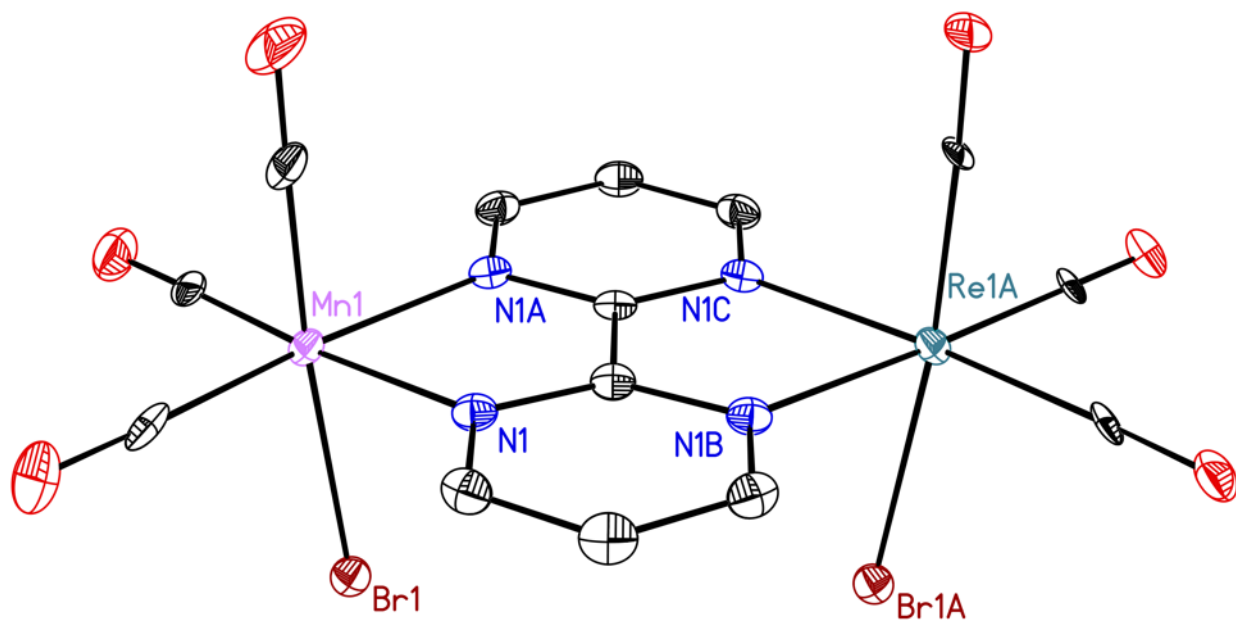

**Figure S42:** Solid-state structure of complex **6-syn**. Hydrogen atoms, a disordered acetone molecule, and a disordered molecule of **6-syn** are omitted for clarity. Displacement ellipsoids are shown at the 50% probability level.

### Full Solid-State Structure of Complex 6-syn.

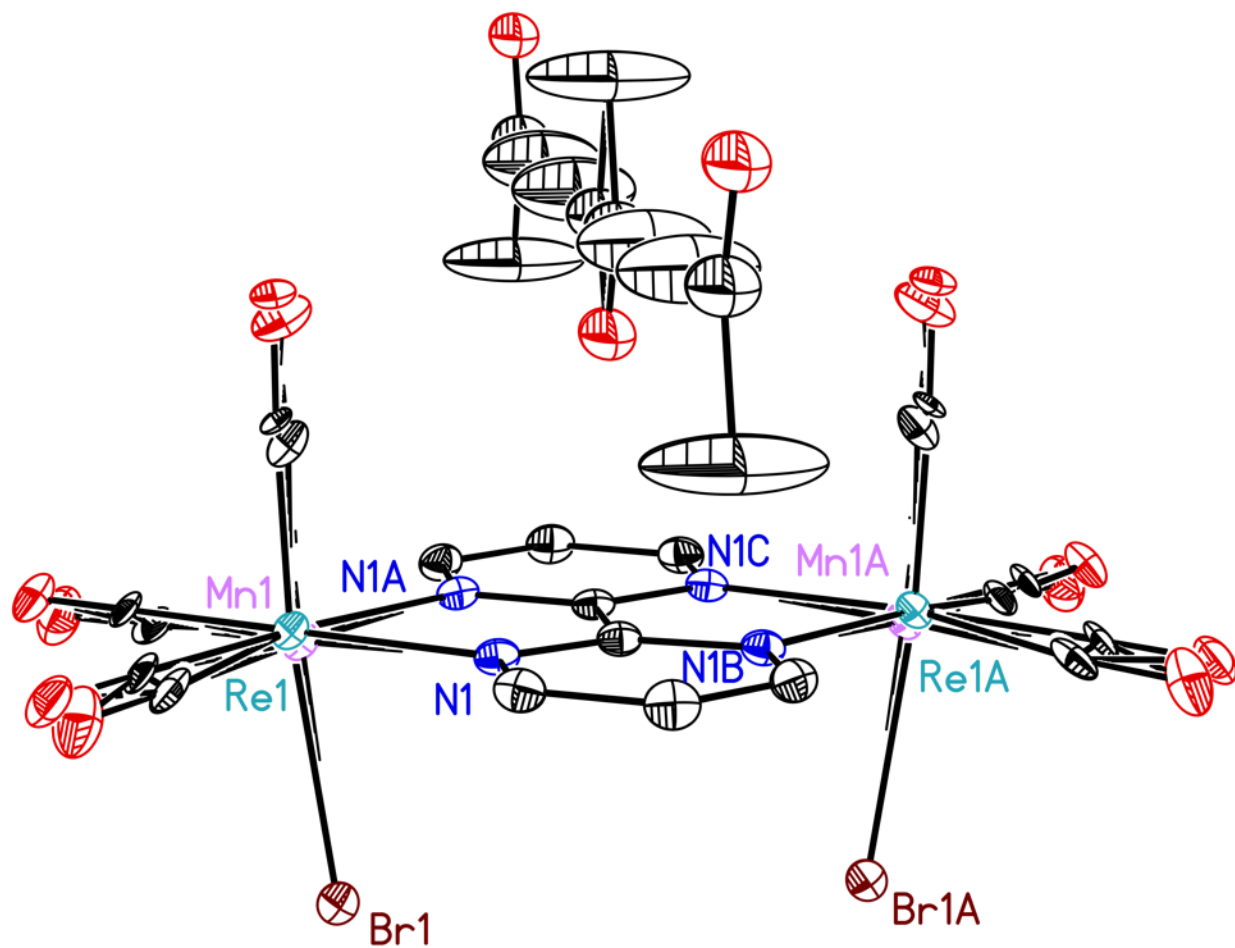

**Figure S43:** Solid-state structure of complex **6-syn**. Hydrogen atoms are omitted for clarity. Displacement ellipsoids are shown at the 50% probability level.



## References

- <sup>1</sup> APEX2, Version 2 User Manual, M86-E01078, Bruker Analytical X-ray Systems: Madison, WI, June 2006.
- <sup>2</sup> G. M. Sheldrick, SADABS (version 2008/1): Program for Absorption Correction for Data from Area Detector Frames, University of Göttingen, 2008.
- <sup>3</sup> G. M. Sheldrick, Crystal structure refinement with SHELXL. *Acta Crystallogr., Sect. A: Found. Crystallogr.* 2015, **71**, 3-8.
- <sup>4</sup> O. V. Dolomanov, L. J. Bourhis, R. J. Gildea, J. A. K. Howard, H. J. Puschmann, *Appl. Crystallogr.* 2009, **42**, 339-341.
